26 **Abstract**

27 Bacterial growth and cell division requires precise spatiotemporal regulation of the synthesis and  
28 remodelling of the peptidoglycan layer that surrounds the cytoplasmic membrane. GpsB is a  
29 cytosolic protein that affects cell wall synthesis by binding to the cytoplasmic mini-domains of  
30 peptidoglycan synthases to ensure their correct subcellular localisation. Here we have discovered  
31 critical structural features for the interaction of GpsB with peptidoglycan synthases from three  
32 different bacteria and demonstrated their importance for cell wall growth and viability. We have  
33 used these structural motifs to predict and confirm novel partners of GpsB in *Bacillus subtilis*,  
34 illuminating the role of this key regulator of peptidoglycan synthesis. GpsB thus functions as an  
35 adaptor, to mediate the interaction between membrane proteins, scaffolding proteins, signalling  
36 proteins and enzymes to generate larger protein complexes at specific sites in a bacterial cell cycle-  
37 dependent manner. Given the importance of GpsB in pathogenic bacteria, this study has not only  
38 revealed mechanistic details of how cell wall synthesis is co-ordinated with the bacterial cell cycle  
39 but could also represent a starting point for the design of much needed new antibiotics.

40

41 Peptidoglycan (PG), a network of glycan strands connected by short peptides, forms the essential  
42 cell envelope that maintains cell shape and protects bacteria from osmotic stresses<sup>1</sup>. High molecular  
43 weight (HMW) bi-functional penicillin binding proteins (class A PBPs) are PG synthases that  
44 catalyse glycan strand polymerisation and peptide crosslinking, whereas HMW class B mono-  
45 functional PBPs only have transpeptidase functions<sup>2</sup>. The PG layer needs remodelling to enable  
46 normal cell growth and division and thus the bacterial cell cycle requires the extracellular activities  
47 of PBPs<sup>3</sup> and PG hydrolases<sup>4</sup> to be co-ordinated. The outer membrane-anchored LpoA/B  
48 lipoproteins activate their cognate PBP1A/1B PG synthases in the synthesis of the thin, periplasmic  
49 PG layer in the Gram-negative paradigm *Escherichia coli*<sup>5,6</sup>. By contrast, Gram-positive bacteria  
50 have a much thicker PG layer that is complemented with other anionic cell wall polymers. PG  
51 synthesis regulation in Gram-positive bacteria involves protein phosphorylation by orthologues of  
52 the serine/threonine kinase PknB<sup>7</sup>/StkP<sup>8</sup>, and dedicated cell cycle scaffolding proteins including  
53 DivIVA<sup>9</sup>, EzrA<sup>10</sup> and GpsB<sup>11,12</sup>. However, the molecular mechanisms that modulate PG synthesis in  
54 Gram-positive bacteria are virtually unknown.

55

56 GpsB has emerged as a major regulator of PG biosynthesis in low G+C Gram-positive bacteria, and  
57 its homologues (DivIVA/Wag31/antigen 84) in Actinobacteria play essential roles in hyphal growth  
58 and branching<sup>13-15</sup>. It was initially characterised in *Bacillus subtilis* where severe cell division and  
59 growth defects were observed when both *gpsB* and *ezrA*<sup>11</sup> or *gpsB* and *ftsA*<sup>12</sup> were deleted. Both  
60 EzrA and FtsA play roles in the dynamics and membrane anchoring of the FtsZ Z-ring, the  
61 constriction of which is fundamental to cell division<sup>16</sup>. The Z-ring also recruits downstream  
62 proteins, including PBPs<sup>17,8</sup>, to complete the process. Deletion of *gpsB* alone in *Listeria*  
63 *monocytogenes* causes marked growth and division defects at 37°C and is lethal at 42°C<sup>19</sup>.  
64 Moreover, *gpsB* deletion in *L. monocytogenes* also results in enhanced susceptibility to  $\beta$ -lactam<sup>19</sup>  
65 and fosfomycin<sup>20</sup> antibiotics, reduced virulence in an insect infection model<sup>19</sup>, and caused  
66 alterations to PG structure<sup>21</sup>. Mutations in *gpsB* that affect binding to the PG synthase PBPA1 also

67 show a lethal phenotype in *L. monocytogenes* at 42°C<sup>19</sup>. The *gpsB* gene is essential in the  
68 *Streptococcus pneumoniae* D39 progenitor strain as well as in some of its laboratory derivatives and  
69 its inactivation results in elongated cells unable to divide<sup>22-24</sup>. In addition, a recent genome-wide  
70 association study of *S. pneumoniae* clinical isolates revealed that the presence of *gpsB* variants is  
71 correlated significantly to  $\beta$ -lactam resistance<sup>25</sup>, suggesting that GpsB may have fitness and  
72 pleiotropic roles in maintaining cell wall integrity during antibiotic stress.

73

74 In both *B. subtilis*<sup>11</sup> and *L. monocytogenes*<sup>19</sup> the cytosolic GpsB localises to the lateral side walls of  
75 newborn, growing cells and to the septum of dividing cells, the same localisation pattern as that of  
76 *B. subtilis* PBP1<sup>11</sup>. In *S. pneumoniae*, GpsB localises to mid-cell<sup>22</sup>, the only region of active PG  
77 synthesis for both peripheral (side-wall) elongation and cell division in this bacterium. The  
78 localisation of GpsB at regions of active PG synthesis allows for the interaction of GpsB with the  
79 poorly characterised cytoplasmic mini-domains of PG synthases<sup>11,19,26,27</sup>. *S. pneumoniae* GpsB  
80 (*SpGpsB*) has been found to co-immunoprecipitate with *SpPBP2a*, *SpPBP2b* and *SpMreC*<sup>24</sup>,  
81 suggesting these proteins form a complex that is regulated by *SpGpsB*<sup>24</sup>.

82

83 To gain molecular understanding of GpsB function, we have solved three crystal structures of PBP  
84 cytoplasmic mini-domains in complex with GpsB, the first structures of a PG synthase in complex  
85 with a cytoplasmic cell cycle regulator. Despite a marked absence of sequence and structural  
86 homology, we have discovered that the PBP domains interact with equivalent surfaces in GpsB  
87 using an arginine that is conserved in the respective orthologues of the PBPs. The visualisation of  
88 each complex has allowed a comprehensive mutagenesis strategy and functional study to rationalise  
89 the role of each interfacial amino acid in the PBP:GpsB pairs. We have discovered a sequence motif  
90 used by the *B. subtilis* PG synthase to interact with GpsB. This motif has been used to query the *B.*  
91 *subtilis* proteome for potential new partners of GpsB, and we have identified two new members of  
92 the GpsB interactome in this organism, and provide evidence for their connection to other,

93 established proteins in growth and division. Therefore, the role of GpsB in the bacterial cell cycle is  
94 as an adaptor<sup>28-30</sup>, docking PG synthases to other cell wall enzymes, scaffolds and shape  
95 determinants into protein complexes that drive division (divisome) and peripheral growth  
96 (elongasome).

97

## 98 **Results**

### 99 **The first 16 amino acids of *BsPBP1* drive the interaction with *BsGpsB***

100 GpsB is an influential cell cycle regulator in low G+C Gram-positive bacteria and hence we set out  
101 to establish the common rules by which GpsB interacts with major PG synthases in three important  
102 bacteria - one model species (*B. subtilis*) and two pathogens (*L. monocytogenes* and *S.*  
103 *pneumoniae*). It had been determined previously by us that full-length *B. subtilis* PBP1 (*BsPBP1*)  
104 bound to full-length *BsGpsB* with a  $K_d$  of 0.7  $\mu\text{M}$ <sup>19</sup>. Deletion of the first 16 amino acids of  
105 *BsPBP1*<sub>17-914</sub> severely affected *BsGpsB* binding: no interaction was observed even when 25  $\mu\text{M}$   
106 *BsGpsB* was injected over a *BsPBP1*<sub>17-914</sub>-immobilised SPR chip (**Figure 1A**). We subsequently  
107 solved the crystal structure of the *BsGpsB*<sub>5-64</sub>:*BsPBP1*<sub>1-17</sub> complex (**Figure 1B,1C**). The *BsPBP1*<sub>1-17</sub>  
108 peptide is predominantly  $\alpha$ -helical and there are no substantial conformational changes in unbound  
109 *BsGpsB*<sub>5-64</sub> on binding *BsPBP1*<sub>1-17</sub>. The *BsPBP1*<sub>1-17</sub>  $\alpha$ -helix is stabilized by an intramolecular salt  
110 bridge between Glu9 and Arg12 and by a hydrogen bond between the sidechain of Ser7 and the  
111 backbone amide of Ala10. A prominent feature of the complex is the deep penetration of the  
112 sidechain of *BsPBP1*<sup>Arg8</sup> into the groove between *BsGpsB*<sub>5-64</sub>  $\alpha$ -helices 1 and 2, contacting the  
113 mainchain carbonyl oxygens of *BsGpsB*<sup>Ile13</sup>, *BsGpsB*<sup>Leu14</sup> and *BsGpsB*<sup>Lys16</sup> and forming a salt bridge  
114 with *BsGpsB*<sup>Asp31</sup> (**Figure 1C**), which in turn is tethered in place by hydrogen bonds to the hydroxyl  
115 of *BsGpsB*<sup>Tyr25</sup>. The backbone amides of *BsPBP1*<sup>Arg8</sup> and *BsPBP1*<sup>Glu9</sup> interact with *BsGpsB*<sup>Asp35</sup>  
116 mimicking the mainchain interactions in successive turns in an  $\alpha$ -helix. In a longer  $\alpha$ -helix, the  
117 backbone amides of *BsPBP1*<sup>Arg8</sup> and *BsPBP1*<sup>Glu9</sup> would not be available to interact with  
118 *BsGpsB*<sup>Asp35</sup> because of intra-helical hydrogen bonds with the mainchain carbonyls of *BsPBP1*<sup>Phe5</sup>

119 and *BsPBP1*<sup>Asn6</sup>. The sidechain of *BsPBP1*<sup>Arg11</sup> forms hydrogen bonds with the carbonyl oxygen of  
120 *BsGpsB*<sup>Leu14</sup> and a salt bridge with *BsGpsB*<sup>Glu17</sup>. Van der Waals' interactions connect *BsPBP1*<sup>Arg8</sup>  
121 and *BsGpsB*<sup>Leu34</sup> (**Figure 1C**), and *BsPBP1*<sup>Glu9</sup> and *BsGpsB*<sup>Lys32</sup>.

122

123 The importance of the interactions described above was confirmed by fluorescence polarisation  
124 (FP) and circular dichroism (CD). The *BsGpsB*<sup>Glu17Ala</sup>, *BsGpsB*<sup>Tyr25Phe</sup>, *BsGpsB*<sup>Asp31Ala</sup> and  
125 *BsGpsB*<sup>Asp35Ala</sup> mutations had little impact on protein stability (**Supplementary Figure 1A**) and  
126 each reduced the affinity for *BsPBP1*<sub>1-32</sub> by more than 8-fold (**Supplementary Figure 1B**,  
127 **Supplementary Table 1**). *BsPBP1*<sup>Arg8Lys</sup>, *BsPBP1*<sup>Arg8Ala</sup> and *BsPBP1*<sup>Arg11Ala</sup> mutations each  
128 resulted in reduced affinities for *BsGpsB*<sub>1-68</sub> by at least 5-fold (**Figure 1D**, **Supplementary Table**  
129 **1**). *BsPBP1*<sub>1-32</sub><sup>Arg28Ala</sup> had no effect on binding (**Figure 1D**, **Supplementary Table 1**), confirming  
130 that non-specific electrostatics do not drive the *BsGpsB*:*BsPBP1* interaction. The Ser7Ala and  
131 Ala10Pro mutations each reduced the affinity for *BsGpsB*<sub>1-68</sub> by at least 6-fold (**Figure 1D**,  
132 **Supplementary Figure 1C**, **Supplementary Table 1**) by affecting the  $\alpha$ -helix of *BsPBP1*<sub>1-32</sub>. Ser7  
133 acts as the helix N-cap, a role that can also be performed by Asn and Thr<sup>31</sup>, and substitutions  
134 equivalent in helical positions to Ser7Ala and Ala10Pro destabilise model peptides<sup>31,32</sup>. Finally, the  
135 importance of PBP1 Ser7, Arg8 and Arg11 to GpsB binding is highlighted because these are the  
136 most well conserved residues in an alignment of the cytoplasmic mini-domains of *Bacillaceae*  
137 PBP1 PG synthases (**Supplementary Figure 1D**).

138

### 139 *L. monocytogenes* GpsB interacts with PBPA1 via a conserved TRxxYR motif

140 The deletion of *gpsB* alone in *B. subtilis* has no readily-apparent phenotype until combined with  
141 deletions in *eZR*<sup>12</sup> or *ftsA*<sup>12</sup>; by contrast, the deletion of *gpsB* in *L. monocytogenes* is lethal when  
142 grown at 42°C<sup>19</sup>. Since GpsB in both species interact with class A PG synthases, we next  
143 determined whether the rules established above for the *BsGpsB*:*BsPBP1* interaction could be  
144 applied directly to *LmGpsB*:*LmPBPA1*. The cytoplasmic mini-domain of *LmPBPA1* has an

145 abundance of positively charged residues (**Supplementary Figure 2A**), but lacks an exact copy of  
146 the SRxxR(R/K) motif of *Bacillaceae* PBP1 (**Supplementary Figure 1A**), the closest equivalent is  
147 TRxxYR. In FP *LmPBPA1*<sub>1-20</sub> bound to *LmGpsB*<sub>1-73</sub> with an affinity similar to that of *BsPBPA1*<sub>1-32</sub>  
148 for *BsGpsB*<sub>1-68</sub> (**Supplementary Figure 2B, Supplementary Table 1**), but we were unable to co-  
149 crystallize *LmGpsB* with *LmPBPA1* peptides to visualise these interactions and to compare them to  
150 *BsGpsB*<sub>5-64</sub>:*BsPBP1*<sub>1-17</sub>. Consequently we co-crystallized *BsGpsB*<sub>5-64</sub><sup>Lys32Glu</sup>:*LmPBPA1*<sub>1-21</sub> that can  
151 act as a surrogate because (i) all the GpsB interfacial residues in the *BsGpsB*<sub>5-64</sub>:*BsPBP1*<sub>1-17</sub>  
152 complex are conserved in *LmGpsB* except for Lys32, which is glutamate in *LmGpsB*; (ii) *LmGpsB*  
153 and *BsGpsB* use overlapping PBP binding sites<sup>19</sup>; (iii) the  $K_d$ s of *BsGpsB*<sub>1-68</sub><sup>Lys32Glu</sup>:*LmPBPA1*<sub>1-20</sub>  
154 and *LmGpsB*<sub>1-73</sub>:*LmPBPA1*<sub>1-20</sub> are almost identical (**Supplementary Figure 2B, Supplementary**  
155 **Table 1**). However, the majority of the *LmPBPA1*<sub>1-15</sub> peptide in the subsequent structure of the  
156 *BsGpsB*<sub>1-68</sub><sup>Lys32Glu</sup>:*LmPBPA1*<sub>1-15</sub> complex was disordered except for an arginine occupying the same  
157 orientation as *BsPBP1*<sub>1-17</sub><sup>Arg8</sup> in the *BsGpsB*<sub>5-64</sub>:*BsPBP1*<sub>1-17</sub> complex (**Figure 2A**). This sole arginine  
158 makes the same interactions as described above (**Figure 1C**). The interaction of *BsGpsB*<sub>5-64</sub><sup>Lys32Glu</sup>  
159 with *LmPBPA1*<sub>1-15</sub> thus centres almost entirely on a single arginine and how *LmGpsB* discerns  
160 *LmPBPA1* over other arginine-rich peptides was determined by FP. *LmPBPA1*<sub>1-20</sub><sup>Arg8Ala</sup> and  
161 *LmPBPA1*<sub>1-20</sub><sup>Arg12Ala</sup> reduced the affinity for *BsGpsB*<sub>1-68</sub><sup>Lys32Glu</sup> by >15- and ~4-fold, respectively  
162 (**Supplementary Figure 2B, Supplementary Table 1**). Reintroducing positive charge into  
163 *LmPBPA1*<sub>1-20</sub><sup>Arg8Ala</sup> did not restore wild-type binding affinity as *LmPBPA1*<sub>1-20</sub><sup>Arg8AlaSer16Arg</sup> bound to  
164 *BsGpsB*<sub>1-68</sub><sup>Lys32Glu</sup> with an affinity at least 10-fold weaker than wild-type (**Supplementary Figure**  
165 **2B, Supplementary Table 1**). Bacterial two-hybrid assays (BACTH) support the central  
166 importance of *LmPBPA1*<sup>Thr7</sup>, *LmPBPA1*<sup>Arg8</sup> and *LmPBPA1*<sup>Arg12</sup>, and to a lesser extent  
167 *LmPBPA1*<sup>Tyr11</sup>, and that non-specific electrostatic interactions play little part in binding *LmGpsB*  
168 (**Figure 2B**).

169



170 *Lm*PBPA1<sup>Arg8</sup> and *Bs*PBP1<sup>Arg8</sup> are equivalent in their interactions with GpsB. Of the other GpsB-  
171 binding determinants of *Bs*PBP1, *Lm*PBPA1 lacks an analogous *Bs*PBP1<sup>Arg11</sup>. The sequential  
172 equivalent is *Lm*PBPA1<sup>Tyr11</sup>, but this residue is completely disordered, and its mutation to alanine  
173 reduced the affinity for *Bs*GpsB<sub>1-68</sub><sup>Lys32Glu</sup> by only 2-fold (**Supplementary Figure 2B**). The  
174 importance of  $\alpha$ -helix formation in *Lm*PBPA1<sub>1-21</sub> for GpsB binding was confirmed by CD of  
175 *Lm*PBPA1<sub>1-21</sub><sup>Gln10Pro</sup> (**Supplementary Figure 2C**) and a concomitant >7-fold reduction in binding  
176 affinity (**Supplementary Figure 2B, Supplementary Table 1**). The effects of mutations to the  
177 crucial *Lm*GpsB-interacting residues in *Lm*PBPA1 were also probed *in vivo* using fosfomycin  
178 sensitivity as a reporter, since *L. monocytogenes*  $\Delta$ *gpsB* mutants are more susceptible to this  
179 antibiotic at 37°C<sup>20</sup>. Effects on fosfomycin sensitivity were apparent in mutants carrying the  
180 *pbpAI*<sup>Arg8AlaArg12Ala</sup> and *pbpAI*<sup>Gln10Pro</sup> alleles but only when PBPA2, the PBPA1 paralogue, was also  
181 absent (**Figure 2C**). Synthetic lethality with *pbpA2* and a growth defect at 42°C is characteristic of  
182 the *L. monocytogenes* null *gpsB* mutant<sup>19</sup>, suggesting that the observed effects partially phenocopy  
183  $\Delta$ *gpsB*. However, no *pbpAI* mutation completely phenocopied the  $\Delta$ *gpsB* mutant (**Supplementary**  
184 **Figure 2D**). Taken together, our data highlight the importance of a conserved arginine in class A  
185 PG synthases for interacting with GpsB in two species. Furthermore, since *pbpAI* does not  
186 phenocopy *gpsB* in *L. monocytogenes*, and *gpsB* deletion on its own in *B. subtilis* has no clear  
187 phenotype, GpsB must have additional functions in both bacteria.

## 188

### 189 **Extending the GpsB interactome in *B. subtilis* and *L. monocytogenes***

190 The data presented above describe features critical for interactions involving *Bs*GpsB, which  
191 include a helical SRxxR(R/K) motif in close proximity to the membrane. To identify hitherto  
192 unidentified *Bs*GpsB-interacting proteins, the *B. subtilis* proteome was queried with the  
193 SRxxR(R/K) motif. Two previously uncharacterised ORFs, *Bs*YpbE and *Bs*YrrS, conform to all the  
194 features described above. *Bs*YpbE is a membrane protein with a 59-residue cytoplasmic domain that  
195 encodes a SRVERR motif. The extracellular region, residues 79-240, contains a LysM (lysine motif)



196 domain between residues 189-235; LysM domains are ~40-residue, degenerate PG- and chitin-  
197 binding modules widespread in bacteria and eukaryotes. *yrrS* is found in a bicistronic operon widely  
198 conserved in the *Bacillaceae* with the gene (*yrrR*) encoding a class B PBP, PBP4b<sup>33</sup>, suggesting  
199 these genes have a linked function in cell wall homeostasis<sup>34</sup>. *BsYrrS* comprises an 18-residue  
200 cytoplasmic domain with two potential, overlapping *BsGpsB*-binding motifs SRYENR and  
201 NRDKRR and an extracellular domain that belongs to the widespread and currently uncharacterised  
202 DUF1510 family.

203

204 LysM domains are frequently found as tandem repeats within bacterial proteins<sup>35</sup> and the individual  
205 domains can act co-operatively to bind PG<sup>36,37</sup>. *BsYpbE* contains one LysM domain hence  
206 oligomerization of *BsYpbE* may enhance PG binding, with the oligomerisation of the extracellular  
207 LysM domain of *BsYpbE* controlled by cytoplasmic, hexameric *BsGpsB*<sup>26</sup>, the essential form of the  
208 protein *in vivo*<sup>19</sup>. In the absence of purified, full-length *BsYpbE* to test this hypothesis directly,  
209 monomeric and dimeric forms of *BsYpbE*<sub>130-240</sub>, which encompasses the sole extracellular LysM  
210 domain, were generated instead. Dimeric *BsYpbE*<sub>130-240</sub> was prepared by mutation of Ser132 to  
211 cysteine, enabling disulphide-linked *BsYpbE*<sub>130-240</sub><sup>Ser132Cys</sup> dimers to be purified. In pulldown assays  
212 the binding of *BsYpbE*<sub>130-240</sub><sup>Ser132Cys</sup> dimers to PG was enhanced considerably relative to the  
213 monomeric, cysteine-free version of *BsYpbE*<sub>130-240</sub> (**Supplementary Figure 3A**) and, therefore, the  
214 binding of YpbE to PG is stimulated by its multimerisation, presumably driven in *B. subtilis* by  
215 hexameric GpsB.

216

217 The interaction of *BsGpsB*<sub>1-68</sub> with *BsYrrS* and *BsYpbE* was assessed by FP and BACTH. *BsGpsB*<sub>1-</sub>  
218 <sub>68</sub> bound to *BsYpbE*<sub>1-21</sub> and *BsYrrS*<sub>1-18</sub> with  $K_d$  values of 13  $\mu$ M (**Figure 3A**) and 430  $\mu$ M (**Figure**  
219 **3B**), respectively. The specificity of these interactions was consistent with the impact of  
220 *BsGpsB*<sup>Asp31Ala</sup> and *BsGpsB*<sup>Tyr25Phe</sup> mutations, each of which reduced the affinities for *BsYrrS*<sub>1-18</sub>  
221 and *BsYpbE*<sub>1-21</sub> by 7- and ~40-fold, respectively (**Figure 3A,3B**), and in-line with the roles of

222 *BsGpsB*<sup>Asp31</sup> and *BsGpsB*<sup>Tyr25</sup> in defining the *BsPBP1* binding site. Interactions of *BsGpsB* with  
223 *BsYrrS* and *BsYpbE* were also detected by BACTH, with the interactions mapping to *BsGpsB*<sub>1-65</sub> in  
224 both cases (**Figure 3C**). *GpsB* is only conditionally essential in *B. subtilis*<sup>11,12</sup>, and perhaps it is not  
225 surprising that no obvious cell growth or division phenotypes could be identified by the deletion of  
226 the genes encoding of *BsYrrS*, *BsPBP4b* or *BsYpbE* (data not shown). BACTH was used to confirm  
227 that *BsYrrS* interacted with *BsPBP4b*, *BsPBP1* and *BsRodZ*; the latter two proteins have established  
228 roles in cell division, growth and morphogenesis<sup>38,39</sup>. The *BsPBP1:BsYrrS*<sub>Δ13-16</sub> interaction was  
229 quantified by SPR, where *BsYrrS*<sub>Δ13-16</sub> was used to reduce non-specific binding to the *BsPBP1*-  
230 immobilised SPR chip, and *BsYrrS*<sub>Δ13-16</sub> bound to *BsPBP1* with a  $K_d$  of 20 nM (**Supplementary**  
231 **Figure 3B**). Therefore, these gene products are capable of forming a network of interactions  
232 (**Figure 3D**) that may be nucleated by the formation of a *BsPBP1:BsYrrS* complex given the  
233 affinity of this particular interaction.

234

235 Homologues of *YpbE* do not exist in *L. monocytogenes* and the *YrrS* homologue (*Lmo1495*) does  
236 not contain a signature *BsGpsB*-binding motif and neither protein is found in *S. pneumoniae*. No  
237 strong potential *GpsB*-interacting candidates were identified when the *L. monocytogenes* proteome  
238 was searched with either TRxxYR or SRxxR(R/K) as the query. BACTH was thus used to uncover  
239 additional potential *LmGpsB* functions in *L. monocytogenes* using a bank of known components  
240 from the listerial elongation and division machineries. There is no consensus motif shared by these  
241 proteins, though all have at least one arginine present in their cytoplasmic regions that is conserved  
242 in their respective orthologues. Two classes of hits were identified in the BACTH screen; class I  
243 hits (*LmPBPA1*, *LmMreC* and *LmSepF*, and *LmGpsB* self-interactions) turned blue after one day of  
244 incubation (**Supplementary Figure 3C**). Class II hits turned blue after 2 days incubation at 30°C,  
245 including *LmZapA*, *LmEzrA*, *LmDivIB*, *LmDivIC*, *LmMreC*, *LmMreBH* and the other HMW  
246 *LmPBPs* (**Supplementary Figure 3C**). All of these interactions, except for the *GpsB* self-  
247 interactions, required the *LmGpsB* N-terminal domain (**Supplementary Figure 3C**). In good

248 agreement with the absence of a TRxxYR motif in *LmMreC*, *LmSepF* and *LmZapA*, interactions  
249 with these proteins did not require key residues in the known PBP-binding groove in *LmGpsB*  
250 (**Supplementary Figure 3D**) and reciprocal tests validated the *LmGpsB* class I interactions (data  
251 not shown). It would thus seem that *LmPBPA1* represents the only GpsB binding partner that  
252 employs the TRxxYR motif in *L. monocytogenes*.

253

#### 254 **A different mode of interaction is used by *S. pneumoniae* GpsB to bind to PBP2a**

255 *S. pneumoniae*, more distantly related to either *Bacillus* or *Listeria* and GpsB, is an ovoid-shaped  
256 Gram-positive coccus in which GpsB is essential<sup>22-24</sup>. *SpGpsB* co-immunoprecipitates with  
257 *SpPBP2a* (one of three pneumococcal class A PBPs), *SpMreC* and other proteins, suggesting they  
258 interact at some point in the pneumococcal cell cycle<sup>24</sup>. Synthetic lethality studies in pneumococcal  
259  $\Delta$ *gpsB* suppressor mutants revealed that *pbp1a*, and not *pbp2a*, became essential in the absence of  
260 *gpsB* indicating that *SpPBP2a* is the class A PBP regulated by *SpGpsB* in *S. pneumoniae*<sup>24</sup>. We  
261 found that the cytoplasmic mini-domain of *SpPBP2a* and many of its orthologues contain the  
262 consensus sequence (S/R)RS(R/G)(K/S)xR (**Supplementary Figure 4A**) that resembles the  
263 *Bacillaceae* PBP1 SRxxR(R/K) motif (**Supplementary Figure 1D**). A peptide encompassing this  
264 region, *SpPBP2a*<sub>23-45</sub>, was found by FP to bind to *SpGpsB*<sub>1-63</sub> with a  $K_d$  of 80  $\mu$ M whereas *SpGpsB*<sub>1-63</sub><sup>Asp33Ala</sup>  
265 (equivalent to *BsGpsB*<sup>Asp35Ala</sup>) had a ~40-fold reduced affinity for *SpPBP2a*<sub>23-45</sub> (**Figure**  
266 **4A, Supplementary Table 1**). The crystal structure of *SpGpsB*<sub>4-63</sub> was solved in the presence of  
267 *SpPBP2a*<sub>27-40</sub>; in this instance, each subunit of the *SpGpsB* dimer is peptide-bound (**Figure 4B**).  
268 Peptide binding principally involves two arginines but each *SpGpsB* subunit recognizes the peptide  
269 differently. In *SpGpsB*<sub>4-63</sub> molecule 1, *SpPBP2a*<sub>27-40</sub> recognition centres on Arg31 and Arg36  
270 (**Figure 4C**), whereas molecule 2 involves Arg33 and Arg36 (**Figure 4D**). The arginine pairs  
271 occupy the same positions as *BsPBP1*<sup>Arg11</sup> and *BsPBP1*<sup>Arg8</sup>; Arg36 is equivalent to the former  
272 whereas Arg31 or Arg33 are equivalent to the latter.

273

274 The *SpGpsB:SpPBP2a* interaction was confirmed by BACTH (**Supplementary Figure 4B**). The  
275 *SpGpsB:SpPBP2a* interaction was lost completely with *SpGpsB*<sup>Tyr23Ala</sup>, *SpGpsB*<sup>Val28Ala</sup>,  
276 *SpGpsB*<sup>Asp29Ala</sup>, *SpGpsB*<sup>Leu32Ala</sup> and *SpGpsB*<sup>Asp33Ala</sup> mutated proteins and reduced with  
277 *SpGpsB*<sup>Ile36Ala</sup> (**Figure 5A**). All the *SpGpsB* variants retained the ability to interact with themselves  
278 and with wildtype *SpGpsB* (**Figure 5A, Supplementary Figure 4C**) indicating that these proteins  
279 were functional. Moreover, all the *SpGpsB* variants, except *SpGpsB*<sup>Asp29Ala</sup>, retained some ability to  
280 interact with *SpMreC*, which was also confirmed to interact with *SpGpsB* by BACTH (**Figure 5A,**  
281 **Supplementary Figure 4B**). These results indicate that the interface between GpsB and class A PG  
282 synthases is conserved in the three models studied here, and the GpsB:MreC interface in *L.*  
283 *monocytogenes* (**Supplementary Figure 3D**) overlaps with that in *S. pneumoniae* (**Figure 5A**).

284  
285 Despite differences in the secondary structures of the two independent *SpPBP2a* peptides bound to  
286 the *SpGpsB*<sub>4-63</sub> dimer (**Figure 4B**), the two arginines form a similar network of interactions with  
287 *SpGpsB* as described above (**Figure 1C,2A**) with additional sidechain contacts in molecule 1  
288 between *SpPBP2a*<sup>Ser32</sup> and *SpGpsB*<sup>Asp33</sup> (**Figure 4C**), and *SpPBP2a*<sup>Arg31</sup> and *SpGpsB*<sup>Tyr23</sup>. The  
289 importance of *SpPBP2a*<sup>Arg31</sup> and *SpPBP2a*<sup>Arg33</sup> is further supported by their sequence conservation  
290 (**Supplementary Figure 4A**) and FP (**Figure 4A, Supplementary Table 1**). Although  
291 *SpPBP2a*<sup>Arg31Lys</sup> had only a 2-fold reduced affinity, which probably reflects the ability of Arg33 to  
292 compensate for the loss of Arg31, the binding affinity of *SpPBP2a*<sup>Arg31LysArg33Lys</sup> was reduced >25-  
293 fold relative to wild-type. The importance of the *SpGpsB* residues involved in the interactions with  
294 *SpPBP2a* is also consistent with the phenotype *in vivo* because of the severe growth (**Figure 5B**)  
295 and morphological defects (**Figure 5C**) of *S. pneumoniae* strains harbouring the *SpGpsB*<sup>Tyr23Ala</sup>,  
296 *SpGpsB*<sup>Val28Ala</sup>, *SpGpsB*<sup>Asp29Ala</sup>, *SpGpsB*<sup>Leu32Ala</sup> and *SpGpsB*<sup>Asp33Ala</sup> alleles even though the mutated  
297 proteins were capable of self-interactions (**Supplementary Figure 4C**) and were expressed at  
298 wildtype levels (**Supplementary Figure 4D**). However, no obvious phenotype was observed in *S.*  
299 *pneumoniae* strains carrying the corresponding *SpPBP2a*<sup>Arg31Ala</sup>, *SpPBP2a*<sup>Arg31Lys</sup>, *SpPBP2a*<sup>Arg33Ala</sup>

300 or *SpPBP2a*<sup>Arg31AlaSer32AlaArg36Ala</sup> alleles, even when *pbp1a* was deleted to decouple the effects of  
301 mutations in *SpPBP2a* from *SpPBP1a* activity (**Supplementary Table 2**, data not shown).  
302 Nevertheless, *SpPBP2a* mutants in which amino acids 32-37 or 27-38 or 26-45 were deleted in a  
303  $\Delta$ *pbp1a* background showed progressively reduced growth rates in the three deletion strains and  
304 pronounced morphological defects in the two strains with large deletions (**Supplementary Figure**  
305 **5A, 5B**), despite wildtype levels of protein expression (**Supplementary Figure 5C**). BACTH  
306 results for the correspondent truncated *SpPBP2a* variants showed reduced interactions with *SpGpsB*  
307 in comparison to the wildtype but not with *SpMreC* (**Supplementary Figure 5D, 5E**). Together,  
308 these results support a critical role *in vivo* of the (S/R)RS(R/G)(K/S)xR motif between *SpPBP2a*  
309 residues 30 and 36. However, the observation that all three  $\Delta$ *pbp1a* *pbp2a* deletion mutants are  
310 viable and both growth and morphology phenotypes are different between *S. pneumoniae*  $\Delta$ *pbp1a*  
311 strains depleted for *gpsB* (**Figure 5D**) and  $\Delta$ *pbp1a* strains depleted for *pbp2a* (**Figure 5E**) implies  
312 that *SpPBP2a* binding is just one function for GpsB in *S. pneumoniae*.

313

314 Taken as a whole, our data on three important bacterial systems agree that GpsB is an adaptor  
315 protein that connects a major class A PG synthase with other cell wall and cell cycle proteins, and  
316 to cell shape determinants such as MreC. The identity and mode of interaction of the GpsB-binding  
317 partners varies from species to species and may reflect the different physiologies of each bacterium  
318 and their modes of growth and division.

319

## 320 **Discussion**

321 Bacterial cell growth and division necessitates tight co-ordination between the replication and  
322 segregation of the chromosome, the fission of the cell membrane and the remodelling of the PG.  
323 Consequently proteins and their complexes with major functions on either side of the membrane  
324 must co-ordinate their activities. One potential mechanism involves the interactions of major PG  
325 synthases with their intracellular regulators. Herein we present the first structures of the cell cycle

326 adaptor, GpsB, in complex with the cytoplasmic mini-domains of PG synthases from three different  
327 bacteria, the rod-shaped *B. subtilis* and *L. monocytogenes*, in which *gpsB* is conditionally  
328 essential<sup>11,12,19</sup> and the ovococcal *S. pneumoniae* in which *gpsB* is essential<sup>22-24</sup>. In common with  
329 mammalian adaptors GGA<sup>30</sup> and 14-3-3<sup>40</sup> proteins, the primary binding surface of GpsB is  
330 restricted to a conserved groove between  $\alpha$ -helices. The cytoplasmic mini-domains of the three PG  
331 synthases in the three organisms have little in common except that each utilises a conserved  
332 arginine in their respective sequences to interact with the cognate GpsB. The PG synthase arginine  
333 ‘finger’ pokes into a negatively-charged cavity situated between  $\alpha$ -helices 1 and 2 of GpsB and is  
334 fixed in the same orientation in all structures, just as the phosphoryl group defines the binding  
335 orientation of peptides to 14-3-3<sup>40</sup>. The arginine complements the cavity best when the mainchain  
336 amide protons of it and its downstream residue are accessible to form hydrogen bonds with  
337 *BsGpsB*<sup>Asp35</sup>, *LmGspB*<sup>Asp37</sup> or *SpGspB*<sup>Asp33</sup>. This scenario can occur when the arginine is either at  
338 the start of an  $\alpha$ -helix, such as *BsPBP1*<sup>Arg8</sup>, or at the  $i+1$  position in a type I  $\beta$ -turn, such as  
339 *SpPBP2a*<sup>Arg31</sup>, and the bidentate nature of this interaction explains why free L-arginine does not  
340 displace pre-bound PBP peptides from GpsB even when present at 100-fold molar excess (data not  
341 shown). Similarly, contact to the backbone amide at the  $i+2$  position in 14-3-3 ligands is essential  
342 for binding<sup>40</sup>. Despite a lack of strong sequence and structural homology in the PG synthase  
343 cytoplasmic mini-domains, their binding is dependent upon an identical subset of GpsB residues  
344 including *BsGpsB*<sup>Tyr25</sup>, *BsGpsB*<sup>Asp31</sup>, *BsGpsB*<sup>Asp35</sup> (**Figure 1C**) and their structural equivalents  
345 *LmGspB*<sup>Tyr27</sup>, *LmGspB*<sup>Asp33</sup>, *LmGspB*<sup>Asp37</sup> (**Figure 2A**), and *SpGpsB*<sup>Tyr23</sup>, *SpGpsB*<sup>Asp29</sup> and  
346 *SpGpsB*<sup>Asp33</sup> (**Figure 4C,D**). These amino acids are also conserved in the DivIVA/Wag31/antigen  
347 84 actinobacterial homologues of GpsB, suggesting a role for them in recruiting cell wall synthesis  
348 enzymes to the hyphal tip and future branch sites<sup>13,14</sup>, regions that require nascent PG synthesis in  
349 filamentous bacteria.

351 We originally set out to establish the common rules by which GpsB interacts with major PG  
352 synthases. Other than the arginine finger mode of GpsB recognition, we discovered how GpsB  
353 interacts with at least one class A PBP in each species; that *LmGpsB* interacts with both the cell  
354 shape determinant, MreC<sup>41</sup>, and a regulator of Z-ring dynamics, EzrA<sup>42</sup>, and confirmed the  
355 *SpGpsB*:MreC interaction by BACTH. These new data complement what was previously known  
356 about these interactions in *B. subtilis*<sup>11</sup> and *S. pneumoniae*<sup>23,24</sup>. How GpsB can interact with such  
357 disparate targets remains unknown but *BsGpsB*<sup>Asp31</sup>, *LmGpsB*<sup>Asp33</sup> and *SpGpsB*<sup>Asp29</sup> are important  
358 for interactions with PBPs and other proteins, including MreC, while *LmGpsB*<sup>Asp37</sup> and *SpGpsB*<sup>Asp33</sup>  
359 only interact with PBPs. There must be at least one other surface that is used by GpsB to form  
360 complexes with other proteins in its function as an adaptor.

361

362 The GpsB:PBP interaction interface notably requires no more than three sidechains from any PBP  
363 to complex with GpsB. Protein:peptide contacts involving less well-conserved exosites that flank a  
364 small core, conserved peptide motif can contribute significantly to the affinity of protein:peptide  
365 interactions<sup>43,44</sup>, and the contribution of exosites to affinity may explain why point mutations in  
366 *LmPBPA1* and *SpPBP2a* have a significant impact using peptide fragments *in vitro*, but have  
367 reduced impact *in vivo*. For instance, the *LmPBPA1*<sup>Arg8Ala</sup> mutation had negligible effect *in vivo*  
368 (**Figure 2C, Supplementary Figure 2D**) yet it reduced binding by >15-fold (**Supplementary**  
369 **Table 1**). Similarly *SpPBP2a*<sup>Arg31LysArg33Lys</sup> had a >25-fold impact on binding (**Supplementary**  
370 **Table 1**) yet growth or morphology phenotypes were not evident (**Supplementary Table 2**, data  
371 not shown) until significant stretches of the cytoplasmic mini-domain were deleted  
372 (**Supplementary Figure 5B**).

373

374 We also found some differences in GpsB interactions between the species that may be related to  
375 GpsB species-specific function. In *B. subtilis*, we discovered a critical motif, SRxxR(R/K), found in  
376 close proximity to the membrane that could be used to predict novel GpsB partners. We used this



377 information to identify an interaction network involving cell envelope binding and modifying  
378 proteins that most likely is underpinned by the GpsB hexamer. An RSxxxR motif was identified in  
379 class A PBPs from most streptococci and sequence features that could dictate GpsB-binding can be  
380 found in class A PBPs in other Gram-positive organisms such as the lactococci, *Leuconostocaceae*  
381 and enterococci, including the ESKAPE pathogen *E. faecium* (**Supplementary Figure 6**).  
382 However, sequence-based searches alone will not identify complete GpsB interactomes because the  
383 local structure of the sequence and its proximity to the membrane are also key parameters of GpsB  
384 binding. *SpPBP2a* contains a partially conserved sequence RSxxxR (**Supplementary Figure 4A**)  
385 that resembles the *BsPBP1* signature motif and the *SpPBP2a* mini-domain interacts with each  
386 subunit of the *SpGpsB* dimer in a different way (**Figure 4B-D**). Finally, we have observed here that  
387 mutation or deletion of the cytoplasmic mini-domain of *SpPBP2a* does not phenocopy deletion or  
388 depletion of *gpsB* (**Figure 5C, 5E**). Similarly, a  $\Delta pbpAI$  strain did not phenocopy *gpsB* deletion in  
389 *L. monocytogenes*<sup>19</sup>. Taken together these results imply that there must be at least one other critical  
390 GpsB interaction partner, beyond respective class A PG synthases, that dictates its conditional  
391 essentiality in *L. monocytogenes* and *B. subtilis*, and essentiality under normal growth conditions in  
392 *S. pneumoniae*.

393

394 In every Firmicute (and Actinobacterium) tested thus far, GpsB (or the homologous  
395 DivIVA/Wag31/antigen 84) acts as an adaptor to co-ordinate PG synthase activity with other  
396 processes depending on the physiology of the cell. GpsB hexamerisation can thus bridge the  
397 interaction of multiple binding partners, a function GpsB shares with 14-3-3 proteins that can form  
398 ternary complexes with BCR and Raf-1 by 14-3-3 dimerisation<sup>45</sup>. In bacilli, *BsGpsB* plays a role in  
399 shuttling between the side wall during elongation and the septum during division<sup>11</sup> and, given that  
400 *BsPBP4b* is regulated by  $\sigma$  factors E<sup>33</sup> and F<sup>46</sup>, complexes of *BsPBP4b* and *BsYrrS*, bridged by  
401 *BsGpsB* (**Figure 3C,D**), presumably play a role in the asymmetric cell division characteristic of  
402 endospore-forming bacilli. In listeria, which is closely related to bacilli and shares with them a rod-

403 like morphology, GpsB appears to connect several PBPs with proteins with known roles in  
404 cytokinesis, including Z-ring polymerisation modulators (ZapA, EzrA, SepF), late division proteins  
405 (DivIB, DivIC) and the elongasome (MreC, MreBH) (**Supplementary Figure 3C,D**), all of which  
406 except SepF and MreBH have also been tested in *B. subtilis* and found not to interact with  
407 *BsGpsB*<sup>11</sup>.

408

409 By contrast, the pneumococci have an ovoid cell shape and lack key components such as the  
410 MinCD system for cell division site selection<sup>47</sup>, and MreB-like proteins required for side wall  
411 synthesis<sup>48</sup>. Presumably *SpGpsB* interacts with one or more pneumococcal-specific proteins, the  
412 loss of which may be related to the lethal phenotype. Furthermore, *SpGpsB* affects both StkP  
413 autophosphorylation<sup>24,49</sup> and the StkP-catalysed phosphorylation of *SpDivIVA*<sup>24,49</sup>,  
414 *SpMapZ/LocZ*<sup>24,50</sup>, *SpJag/EloR/KhpB*<sup>51-53</sup> and *SpMacP*<sup>54</sup>. It is not yet clear how the complexes  
415 formed by these proteins are affected by their phosphorylation, except that *SpPBP2a* activity is  
416 dependent upon phosphorylated *SpMacP*<sup>54</sup>, at least in the presence of functional *SpStkP*, or what the  
417 impact is of potential cross-talk to two-component signalling systems<sup>55</sup>.

418

419 Finally, the different phenotypic outcomes associated with *gpsB* deletion or depletion in the three  
420 systems studied herein may reflect the presence of redundant systems in the large genome (4.2  
421 Mbp) of the bacilli, partial redundancy in listeria (2.9 Mbp), and a relative absence of redundancy in  
422 the stripped-down genome (2.1 Mbp) of the pneumococci. The relative affinities and cellular  
423 concentrations of GpsB partners probably dictate which protein(s) is bound by GpsB at any point in  
424 a cell cycle-dependent manner; simultaneous interactions with multiple target proteins is likely to  
425 lead to an increase in avidity of GpsB as more commonly found in antibody:antigen interactions.  
426 However, the intricate networks involving GpsB will only be uncovered by validating the full GpsB  
427 interactome.

428

## 429 **Materials and Methods**

430 Full details of all the experimental procedures are presented in the **Supplementary Information**.

### 431 **Bacterial strains and growth conditions**

432 **Supplementary Table 3** lists all bacterial strains used in this study that were grown in brain heart  
433 infusion (BHI) or LB media at 37°C (or 42°C, where indicated), supplemented with antibiotics if  
434 required. Standard *Escherichia coli* strains were used as cloning<sup>56</sup> and recombinant protein  
435 production hosts.

### 436 437 **General methods, manipulation of DNA and oligonucleotide primers**

438 Bacterial transformation and isolation of plasmid DNA, enzymatic DNA modification and  
439 Quikchange mutagenesis was performed according to standard protocols<sup>56-58</sup> using the plasmids in  
440 **Supplementary Table 4** and the oligonucleotide primers in **Supplementary Tables 5-7**. All  
441 constructs were verified by Sanger DNA sequencing.

### 442 443 **Bacterial two-hybrid experiments (BACTH)**

444 The BACTH system<sup>59</sup> was used to screen GpsB proteins against potential binding partners. The  
445 genes of interest were amplified by PCR and cloned by restriction into the appropriate BACTH  
446 vectors to obtain the corresponding N- and C-terminal hybrid fusions. Domain deletions and single  
447 point mutations were introduced by Quikchange or by subcloning the specific mutated alleles  
448 amplified from their respective DNA template. Plasmids encoding the respective genes fused to the  
449 N- or C-termini of the T18- or the T25-fragment of the *Bordetella pertussis* adenylate cyclase were  
450 co-transformed into *E. coli* BTH101. Co-transformants were selected on nutrient or LB agar plates  
451 containing ampicillin (100 µg/mL), kanamycin (50 µg/mL), X-Gal (40 µg/mL) and IPTG (0.1 - 0.5  
452 mM). Photographs were taken after at least 24 h of incubation at 30°C.

### 453 454 **Construction of *L. monocytogenes* and *S. pneumoniae* mutant strains**

455 Full details of the strain construction can be found in the **Supplementary Information**.

456

#### 457 ***L. monocytogenes* fosfomycin susceptibility assays**

458 Fosfomycin susceptibility of *L. monocytogenes* was measured, and corrected for the disc diameter,  
459 after overnight incubation using fosfomycin-impregnated filter discs.

460

#### 461 **Recombinant protein and peptide production**

462 Recombinant expression constructs for *BsGpsB*<sub>5-64</sub>, *SpGpsB*<sub>1-63</sub> and *SpGpsB*<sub>4-63</sub> were prepared  
463 along similar lines as those for *BsGpsB*<sub>1-68</sub> and *LmGpsB*<sub>1-73</sub>, as described previously<sup>19</sup>. Maltose  
464 binding protein (MBP) fusions of *LmPBPA*<sub>1-20</sub> and *SpPBP2a*<sub>23-45</sub> were cloned into pMAT11, a  
465 modified version of pHAT4<sup>60</sup>, as described previously for MBP-*BsPBP1*<sub>1-32</sub><sup>19</sup>. The ORF encoding  
466 *BsYpbE*<sub>80-240</sub> was cloned into pET28a before the DNA encoding residues 80-129 was deleted by  
467 PCR amplification of the entire plasmid to yield *BsYpbE*<sub>130-240</sub>. The construct for expressing  
468 *BsYrrS*<sub>Δ13-16</sub> was prepared by cloning *yrrS* into pET28a and the DNA coding for residues 13-16 was  
469 deleted by Quikchange.

470

471 *BsGpsB*<sub>1-68</sub>, *SpGpsB*<sub>1-63</sub> and *LmGpsB*<sub>1-73</sub> were purified as described previously<sup>19</sup>. *SpGpsB*<sub>1-63</sub> was  
472 further purified by ammonium sulphate precipitation after thrombin removal of the His<sub>6</sub>-tag.  
473 *BsGpsB*<sub>5-64</sub>, the *BsGpsB*<sub>5-64</sub><sup>K32E</sup> mutant and *SpGpsB*<sub>4-63</sub> were expressed and purified by a similar  
474 protocol except that TEV protease, rather than thrombin, was used to remove the N-terminal His<sub>6</sub>-  
475 tag by overnight cleavage. *YpbE*<sub>130-240</sub> and its Ser132Cys variant were expressed in *E. coli*  
476 BL21(DE3) and purified by ion exchange, ammonium sulphate precipitation and size exclusion.  
477 *YrrS*<sub>Δ13-16</sub> was expressed in *E. coli* BL21(DE3) and His<sub>6</sub>-tagged *YrrS*<sub>Δ13-16</sub> was purified from the  
478 membrane fraction by Ni<sup>+</sup>-NTA affinity and size exclusion chromatography. The PBP peptides,  
479 generated as MBP-fusion proteins, were expressed, purified, fluorescently-labelled and separated  
480 from the MBP fusion partner as described previously<sup>19</sup>.

481

482 All recombinant proteins or peptides were concentrated and flash frozen in small aliquots in liquid  
483 nitrogen and stored at -80°C.

484

485 The *BsPBP1*<sub>1-17</sub>, *LmPBPA1*<sub>1-15</sub> and *SpPBP2a*<sub>27-40</sub> peptides were synthesized chemically (Protein and  
486 Peptide Research Ltd, UK and Severn Biotech, UK).

487

### 488 **Crystallization and structure determination**

489 Co-crystallization of *BsGpsB*<sub>5-64</sub>:*BsPBP1*<sub>1-17</sub>, *BsGpsB*<sub>5-64</sub><sup>Lys32Glu</sup>:*LmPBPA1*<sub>1-15</sub> and *SpGpsB*<sub>4-63</sub>:*SpPBP2a*<sub>27-40</sub>  
490 followed the same procedure. Equal volumes of GpsB protein and PBP peptide  
491 were mixed at final concentrations of 20 and 25 mg/mL, respectively, corresponding to a 1:5 molar  
492 ratio. The protein:peptide complexes were crystallised at room temperature using commercial  
493 crystallization screens and a Mosquito (TTP Labtech) liquid handling robot. All crystals were  
494 mounted in rayon loops and frozen directly in liquid nitrogen.

495

496 All diffraction data were collected at beamlines I24 and I04 at the Diamond synchrotron light  
497 source except for unbound *SpGpsB*<sub>4-63</sub>, which were collected in house using a gallium  
498 METALJET<sup>TM</sup> X-ray source (Bruker AXS GmbH). Diffraction images for *BsGpsB*<sub>5-64</sub>:*BsPBP1*<sub>1-17</sub>  
499 and *SpGpsB*<sub>4-63</sub>:*SpPBP2a*<sub>27-40</sub> were indexed and integrated with XDS<sup>61</sup> and scaled with  
500 AIMLESS<sup>62</sup>; for *BsGpsB*<sub>5-64</sub><sup>Lys32Glu</sup>:*LmPBPA1*<sub>1-17</sub> indexing and integration took place with  
501 DIALS<sup>63</sup>, scaling in XDS<sup>61</sup> and merging with AIMLESS<sup>62</sup>. For unbound *SpGpsB*<sub>4-63</sub> the images  
502 were indexed, integrated, scaled and merged with Proteum 3 (Bruker AXS GmbH). All structures  
503 were solved by molecular replacement in PHASER<sup>64</sup> and rebuilt in COOT<sup>65</sup>, interspersed with  
504 rounds of refinement in REFMAC<sup>66</sup> and PHENIX.REFINE<sup>67</sup>. Statistics for data collection and the  
505 final refined models can be found in **Supplementary Table 8**.

506

507 **FP assays**

508 FP experiments were undertaken as described previously<sup>19</sup>, in a buffer of 10 mM Tris.HCl (pH 8.0),  
509 250 mM NaCl, 0.1% reduced Triton X-100. Where TAMRA-labelled peptides were used in FP  
510 assays the excitation wavelength was 540 nm and fluorescence emission was recorded above 590  
511 nm.

512

513 **SPR**

514 All SPR experiments used a running buffer of 10 mM Tris.HCl (pH 8.0), 250 mM NaCl, 0.1%  
515 reduced Triton X-100. *BsPBP1* and *BsPBP1*<sub>17-914</sub> were immobilized on the surface of a CM5 chip  
516 (GE Healthcare) as described previously<sup>19</sup>. For the PBP1/YrrS<sub>Δ13-16</sub> titration 800 RUs of *BsPBP1*  
517 were immobilized on the chip surface; for the *BsPBP1/BsGpsB* titration 1200 RUs of *BsPBP1* were  
518 immobilized.

519

520 **CD analysis**

521 CD spectra were recorded on a JASCO J-810 spectropolarimeter with a PTC-4235 Peltier  
522 temperature controller using 1 mm path length quartz cuvettes. For full wavelength scans a scan  
523 speed of 10 nm/min and a response time of 4 s were used, the final spectra were the average of 4-5  
524 measurements. For thermal melt experiments, a response time of 8 s and scan rate of 1°C/min were  
525 used.

526

527 **Peptidoglycan pulldown assay**

528 PG pulldown assays were carried out in PBS buffer. *B. subtilis* PG (SigmaAldrich) was prepared as  
529 a 10 mg/mL stock. 25 µg of protein were added to 66 µg of PG and incubated for 30 minutes. After  
530 two centrifugation and resuspension steps the final pellet was boiled in SDS-PAGE loading buffer  
531 before analysis by SDS-PAGE without reducing agents.

532

533 **Acknowledgements**

534 This work was supported by grants from the UK BBSRC (BB/M001180/1 to R.J.L.), the German  
535 DFG (HA 6830/1-1 and HA 6830/1-2 to S.H.), the American NIH (RO1GM113172 and  
536 RO1GM114315 to M.E.W). O.M. is funded by a Contribution to Basic Research (LR7/2007) from  
537 the Autonomous Region of Sardinia. F.C. is funded by the European Commission (International  
538 Training Network Train2Target, No. 721484) and Z.R. is funded by a UK BBSRC DTP studentship  
539 (BB/M011186/1). We thank the Diamond synchrotron light source for access to its beamlines and  
540 thank its staff for support during data collection. We are indebted to Waldemar Vollmer for critical  
541 reading of the manuscript and for supplying *S. pneumoniae* genomic DNA. We thank Helen Waller  
542 for technical assistance with SPR experiments and Simon Thorpe at the University of Sheffield for  
543 mass spectroscopy analysis of peptide samples.

544  
545 **References**

- 546 1. Vollmer, W., Blanot, D. & de Pedro, M.A. Peptidoglycan structure and architecture. *FEMS*  
547 *Microbiol. Rev.* **32**, 149-167 (2008).
- 548 2. Sauvage, E., Kerff, F., Terrak, M., Ayala, J.A. & Charlier, P. The penicillin-binding  
549 proteins: structure and role in peptidoglycan biosynthesis. *FEMS Microbiol. Rev.* **32**, 234-  
550 258 (2008).
- 551 3. Egan, A.J. & Vollmer, W. The physiology of bacterial cell division. *Ann. N.Y. Acad. Sci.*  
552 **1277**, 8-28 (2013).
- 553 4. Uehara, T. & Bernhardt, T.G. More than just lysins: peptidoglycan hydrolases tailor the cell  
554 wall. *Curr. Opin. Microbiol.* **14**, 698-703 (2011).
- 555 5. Typas, A. et al. Regulation of peptidoglycan synthesis by outer-membrane proteins. *Cell*  
556 **143**, 1097-1109 (2010).
- 557 6. Paradis-Bleau, C. et al. Lipoprotein cofactors located in the outer membrane activate  
558 bacterial cell wall polymerases. *Cell* **143**, 1110-1120 (2010).



- 559 7. Fernandez, P. et al. The Ser/Thr protein kinase PknB is essential for sustaining  
560 mycobacterial growth. *J. Bacteriol.* **188**, 7778-7784 (2006).
- 561 8. Beilharz, K., Nováková, L., Fadda, D., Branny, P., Massidda, O. & Veening, J.W. Control  
562 of cell division in *Streptococcus pneumoniae* by the conserved Ser/Thr protein kinase StkP.  
563 *Proc Natl Acad Sci USA* **109**, E905-E113 (2012).
- 564 9. Cha, J.H. & Stewart, G.C. The *divIVA* minicell locus of *Bacillus subtilis*. *J Bacteriol.* **179**,  
565 1671-1683 (1997).
- 566 10. Levin, P.A., Kurtser, I.G. & Grossman, A.D. Identification and characterization of a  
567 negative regulator of FtsZ ring formation in *Bacillus subtilis*. *Proc Natl Acad Sci USA* **96**,  
568 9642-9647 (1999).
- 569 11. Claessen, D. et al. Control of the cell elongation-division cycle by shuttling of PBP1 protein  
570 in *Bacillus subtilis*. *Mol. Microbiol.* **68**, 1029-46 (2008).
- 571 12. Tavares, J.R., de Souza, R.F., Meira, G.L. & Gueiros-Filho, F.J. Cytological  
572 characterization of YpsB, a novel component of the *Bacillus subtilis* divisome. *J. Bacteriol.*  
573 **190**, 7096-7197 (2008).
- 574 13. Flårdh, K. Essential role of DivIVA in polar growth and morphogenesis in *Streptomyces*  
575 *coelicolor* A3(2). *Mol. Microbiol.* **49**, 1523-1536 (2003).
- 576 14. Hempel, A.M., Wang, S.B., Letek, M., Gil, J.A. & Flårdh, K. Assemblies of DivIVA mark  
577 sites for hyphal branching and can establish new zones of cell wall growth in *Streptomyces*  
578 *coelicolor*. *J. Bacteriol.* **190**, 7579-7583 (2008).
- 579 15. Santos-Beneit, F., Roberts, D.M., Cantlay, S., McCormick, J.R. & Errington, J. A  
580 mechanism for FtsZ-independent proliferation in *Streptomyces*. *Nat. Commun.* **8**, 1378  
581 (2017).
- 582 16. Ma, X., Ehrhardt, D.W. & Margolin, W. Colocalization of cell division proteins FtsZ and  
583 FtsA to cytoskeletal structures in living *Escherichia coli* cells by using green fluorescent  
584 protein. *Proc. Natl. Acad. Sci. USA* **93**, 12998-3003 (1996).

- 585 17. Bisson-Filho, A.W. et al. Treadmilling by FtsZ filaments drives peptidoglycan synthesis and  
586 bacterial cell division. *Science* **355**, 739-743 (2017).
- 587 18. Gamba, P., Veening, J.W., Saunders, N.J., Hamoen, L.W. & Daniel, R.A. Two-step  
588 assembly dynamics of the *Bacillus subtilis* divisome. *J Bacteriol.* **191**, 4186-4194 (2009).
- 589 19. Rismondo, J. et al. Structure of the bacterial cell division determinant GpsB and its  
590 interaction with penicillin binding proteins. *Mol. Microbiol.* **99**, 978-998 (2016).
- 591 20. Rismondo, J., Bender, J.K. & Halbedel, S. Suppressor mutations linking *gpsB* with the first  
592 committed step of peptidoglycan biosynthesis in *Listeria monocytogenes*. *J. Bacteriol.* **199**,  
593 e00393-16 (2017).
- 594 21. Rismondo, J., Wamp, S., Aldridge, C., Vollmer, W. & Halbedel, S. Stimulation of PgdA-  
595 dependent peptidoglycan N-deacetylation by GpsB-PBP A1 in *Listeria monocytogenes*.  
596 *Mol. Microbiol.* **107**, 472-487 (2018).
- 597 22. Land, A.D. et al. Requirement of essential Pbp2x and GpsB for septal ring closure in  
598 *Streptococcus pneumoniae* D39. *Mol. Microbiol.* **90**, 939-55 (2013).
- 599 23. Fleurie, A. et al. Interplay of the serine/threonine-kinase StkP and the paralogs DivIVA and  
600 GpsB in pneumococcal cell elongation and division. *PLoS Genet.* **10**, e1004275 (2014).
- 601 24. Rued, B.E. et al. Suppression and synthetic-lethal genetic relationships of  $\Delta$ *gpsB* mutations  
602 indicate that GpsB mediates protein phosphorylation and penicillin-binding protein  
603 interactions in *Streptococcus pneumoniae* D39. *Mol. Microbiol.* **103**, 931-957 (2017).
- 604 25. Mobegi, F.M. et al. Deciphering the distance to antibiotic resistance for the pneumococcus  
605 using genome sequencing data. *Sci. Rep.* **7**, 42808 (2017).
- 606 26. Cleverley, R.M. et al. Subunit arrangement in GpsB, a regulator of cell wall biosynthesis.  
607 *Microb. Drug Resist.* **22**, 446-460 (2016).
- 608 27. Berg, K.H., Straume, D. & Håvarstein, L.S. The function of the transmembrane and  
609 cytoplasmic domains of pneumococcal penicillin-binding proteins 2x and 2b extends beyond  
610 that of simple anchoring devices. *Microbiology* **160**, 1585-1598 (2014).

- 611 28. Morrison, D. 14-3-3: modulators of signaling proteins? *Science* **266**, 56-57 (1994).
- 612 29. Pawson, T. & Scott, J.D. Signaling through scaffold, anchoring, and adaptor proteins.  
613 *Science* **278**, 2075-2080 (1997).
- 614 30. Bonifacino, J.S. The GGA proteins: adaptors on the move. *Nat. Rev. Mol. Cell. Biol.* **5**, 23-  
615 32 (2004).
- 616 31. Doig, A.J. & Baldwin, R.L. N- and C-capping preferences for all 20 amino acids in alpha-  
617 helical peptides. *Prot. Sci.* **4**, 1325-1336 (1995).
- 618 32. Iqbalsyah, T.M. & Doig, A.J. Effect of the N3 residue on the stability of the alpha-helix.  
619 *Prot. Sci.* **13**, 32-39 (2004).
- 620 33. Wei, Y., McPherson, D.C. & Popham, D.L. A mother cell-specific class B penicillin-  
621 binding protein, PBP4b, in *Bacillus subtilis*. *J. Bacteriol.* **186**, 258-261 (2004).
- 622 34. Snel, B., Bork, P. & Huynen, M.A. The identification of functional modules from the  
623 genomic association of genes. *Proc. Natl. Acad. Sci. USA* **99**, 5890-5895 (2002).
- 624 35. Buist, G., Steen, A., Kok, J. & Kuipers, O.P. LysM, a widely distributed protein motif for  
625 binding to (peptido)glycans. *Mol. Microbiol.* **68**, 838-847 (2008).
- 626 36. Wong, J.E. et al. Cooperative binding of LysM domains determines the carbohydrate  
627 affinity of a bacterial endopeptidase protein. *FEBS J.* **281**, 1196-1208 (2014).
- 628 37. Mesnage, S. et al. Molecular basis for bacterial peptidoglycan recognition by LysM  
629 domains. *Nat. Commun.* **5**, 4269 (2014).
- 630 38. Scheffers, D. & Errington, J. PBP1 is a component of the *Bacillus subtilis* cell division  
631 machinery. *J. Bacteriol.* **186**, 5153-5156 (2004).
- 632 39. Alyahya, S.A., Alexander, R., Costa, T., Henriques, A.O., Emonet, T. & Jacobs-Wagner, C.  
633 RodZ, a component of the bacterial core morphogenic apparatus. *Proc. Natl. Acad. Sci. USA*  
634 **106**, 1239-1244 (2009).
- 635 40. Yang, X. et al. Structural basis for protein-protein interactions in the 14-3-3 protein family.  
636 *Proc. Natl. Acad. Sci. USA.* **103**, 17237-17242 (2006).

- 637 41. Leaver, M. & Errington, J. Roles for MreC and MreD proteins in helical growth of the  
638 cylindrical cell wall in *Bacillus subtilis*. *Mol. Microbiol.* **57**, 1196-1209 (2005).
- 639 42. Levin, P.A., Kurtser, I.G. & Grossman, A.D. Identification and characterization of a  
640 negative regulator of FtsZ ring formation in *Bacillus subtilis*. *Proc. Natl. Acad. Sci. USA* **96**,  
641 9642-9647 (1999).
- 642 43. Stein, A. & Aloy, P. Contextual specificity in peptide-mediated protein interactions. *PLoS*  
643 *One* **3**, e2524 (2008).
- 644 44. Frappier, V., Duran, M. & Keating, A.E. PixelDB: Protein-peptide complexes annotated  
645 with structural conservation of the peptide binding mode. *Protein Sci.* **27**, 276-285 (2018).
- 646 45. Braselmann, S. & McCormick, F. Bcr and Raf form a complex *in vivo* via 14-3-3 proteins.  
647 *EMBO J.* **14**, 4839-4848 (1995).
- 648 46. Steil, L., Serrano, M., Henriques, A.O. & Völker, U. Genome-wide analysis of temporally  
649 regulated and compartment-specific gene expression in sporulating cells of *Bacillus subtilis*.  
650 *Microbiology* **151**, 399-420 (2005).
- 651 47. de Boer, P.A., Crossley, R.E. & Rothfield, L.I. A division inhibitor and a topological  
652 specificity factor coded for by the minicell locus determine proper placement of the division  
653 septum in *E. coli*. *Cell* **56**, 641-649 (1989).
- 654 48. Figge, R.M., Divakaruni, A.V. & Gober, J.W. MreB, the cell shape-determining bacterial  
655 actin homologue, co-ordinates cellwall morphogenesis in *Caulobacter crescentus*. *Mol.*  
656 *Microbiol.* **51**, 1321-1332 (2004).
- 657 49. Fleurie, A. et al. Interplay of the serine/threonine-kinase StkP and the paralogs DivIVA and  
658 GpsB in pneumococcal cell elongation and division. *PLoS Genet.* **10**, e1004275 (2014).
- 659 50. Fleurie, A. et al. MapZ marks the division sites and positions FtsZ rings in *Streptococcus*  
660 *pneumoniae*. *Nature* **516**, 259-262 (2014).

- 661 51. Ulrych, A. et al. Characterization of pneumococcal Ser/Thr protein phosphatase *phpP*  
662 mutant and identification of a novel PhpP substrate, putative RNA binding protein Jag. *BMC*  
663 *Microbiol.* **16**, 247 (2016).
- 664 52. Stamsås, G.A., Straume, D., Ruud Winther, A., Kjos, M., Frantzen, C.A. & Håvarstein, L.S.  
665 Identification of EloR (Spr1851) as a regulator of cell elongation in *Streptococcus*  
666 *pneumoniae*. *Mol. Microbiol.* **105**, 954-967 (2017).
- 667 53. Zheng, J.J., Perez, A.J., Tsui, H.T., Massidda, O. & Winkler, M.E. Absence of the KhpA  
668 and KhpB (JAG/EloR) RNA-binding proteins suppresses the requirement for PBP2b by  
669 overproduction of FtsA in *Streptococcus pneumoniae* D39. *Mol. Microbiol.* **106**, 793-814  
670 (2017).
- 671 54. Fenton, A.K. et al. Phosphorylation-dependent activation of the cell wall synthase PBP2a in  
672 *Streptococcus pneumoniae* by MacP *Proc. Natl. Acad. Sci. USA* **115**, 2812-2817 (2018).
- 673 55. Kellogg, S.L. & Kristich, C.J. Convergence of PASTA kinase and two-component signaling  
674 in response to cell wall stress in *Enterococcus faecalis*. *J Bacteriol.* doi: 10.1128/JB.00086-  
675 18 (2018). [Epub ahead of print]
- 676 56. Sambrook, J., Fritsch, E.F. & Maniatis, T. Molecular cloning: a laboratory manual. Cold  
677 Spring Harbor Laboratory Press, Cold Spring Harbor, N.Y. (1989).
- 678 57. Monk, I.R., Gahan, C.G. & Hill, C. Tools for functional postgenomic analysis of *Listeria*  
679 *monocytogenes*. *Appl. Environ. Microbiol.* **74**, 3921-3934 (2008).
- 680 58. Zheng, L., Baumann, U. & Reymond, J.L. An efficient one-step site-directed and site-  
681 saturation mutagenesis protocol. *Nucleic Acids Res.* **32**, 3115 (2004).
- 682 59. Karimova, G., Pidoux, J., Ullmann, A. & Ladant, D. A bacterial two-hybrid system based on  
683 a reconstituted signal transduction pathway. *Proc. Natl. Acad. Sci. U S A* **95**, 5752-5756  
684 (1998).

- 685 60. Peränen, J., Rikkonen, M., Hyvönen, M. & Kääriäinen, L. T7 vectors with modified T7lac  
686 promoter for expression of proteins in *Escherichia coli*. *Anal. Biochem.* **236**, 371-373  
687 (1996).
- 688 61. Kabsch, W. XDS. *Acta Crystallogr.* **D66**, 125-132 (2010).
- 689 62. Evans, P.R. & Murshudov, G.N. How good are my data and what is the resolution? *Acta*  
690 *Crystallogr.* **D69**, 1204-1214 (2013).
- 691 63. Waterman, D.G. et al. Diffraction-geometry refinement in the DIALS framework. *Acta*  
692 *Crystallogr.* **D72**, 558-575 (2016).
- 693 64. McCoy, A. et al. Phaser crystallographic software. *J. Appl. Cryst.* **40**, 658-674 (2007).
- 694 65. Emsley, P., Lohkamp, B., Scott, W.G. & Cowtan, K. Features and development of Coot.  
695 *Acta Crystallogr.* **D66**, 486-501 (2010).
- 696 66. Murshudov, G.N. et al. REFMAC5 for the refinement of macromolecular crystal structures.  
697 *Acta Crystallogr.* **D67**, 355-367 (2011).
- 698 67. Adams, P. et al. PHENIX: a comprehensive Python-based system for macromolecular  
699 structure solution. *Acta Crystallogr.* **D66**, 213-221 (2010).

701 **Figure Legends**

702 **Figure 1: *BsGpsB*:*BsPBP1* interactions are driven by conserved arginines in the  $\alpha$ -helical**  
703 **cytoplasmic minidomain of *BsPBP1*.**

704 (A) *BsGpsB* interacts with the first 16 amino acids of *BsPBP1*. SPR sensorgrams of full-length  
705 *BsGpsB* against immobilised full-length *BsPBP1* (black) and *BsPBP1*<sub>17-914</sub> (red). *BsGpsB* does not  
706 interact with the *BsPBP1*<sub>17-914</sub> coated chip, even when 25  $\mu$ M *GpsB* is injected.

707  
708 (B) Cartoon of the crystal structure of the *BsGpsB*<sub>5-64</sub>:*BsPBP1*<sub>1-17</sub> complex. *BsGpsB*<sub>5-64</sub> is coloured  
709 cyan and *BsPBP1*<sub>1-17</sub> is coloured green. The *BsPBP1*<sub>1-17</sub> peptide binds to a groove between  $\alpha$ -  
710 helices 1 and 2 in only one molecule of *BsGpsB*<sub>5-64</sub> in the crystallographic asymmetric unit as the  
711 second *BsGpsB*-binding site is blocked by crystal contacts. The likely plane of the bacterial  
712 membrane is shown as a red box.

713  
714 (C) The *BsGpsB*<sub>5-64</sub>:*BsPBP1*<sub>1-17</sub> complex is driven by a conserved SRxxR(R/K) motif in *BsPBP1*.  
715 Key interfacial residues in the *BsGpsB*<sub>5-64</sub>:*BsPBP1*<sub>1-17</sub> complex are shown as sticks and coloured  
716 (and labelled) blue and green, respectively. The carbonyl oxygens of *BsGpsB*<sup>Ile13</sup>, *BsGpsB*<sup>Leu14</sup> and  
717 *BsGpsB*<sup>Lys16</sup> are labelled with their respective red numerals. Hydrogen bonds are shown as black  
718 dashed lines and the van der Waals' interactions between *BsGpsB*<sup>Leu34</sup> and *BsPBP1*<sup>Arg8</sup> are in  
719 yellow.

720  
721 (D) Mutation of key *BsPBP1* interfacial residues in the structure of *BsGpsB*<sub>5-64</sub>:*BsPBP1*<sub>1-17</sub> leads to  
722 a loss of binding of TAMRA-labelled *BsPBP1*<sub>1-32</sub> variants to *BsGpsB*<sub>1-68</sub> as measured by  
723 fluorescence polarisation. The calculated dissociation constants can be found in **Supplementary**  
724 **Table 1.**

725

726 **Figure 2: The *LmGpsB*:*LmPBPA1* interactions are also driven by a conserved arginine.**



727 (A) The structure of the *BsGpsB*<sub>5-64</sub><sup>Lys32Glu</sup>:*LmPBPA1*<sub>1-15</sub> complex reveals that only Arg8 of the  
728 *LmPBPA1*<sub>1-15</sub> peptide is ordered. In this cartoon, *BsGpsB*<sub>5-64</sub><sup>Lys32Glu</sup> is coloured cyan and selected  
729 sidechains are drawn as stick with cyan carbons, whereas the *LmPBPA1*<sub>1-15</sub> peptide is represented in  
730 stick form, with green carbons. The carbonyl oxygens of *BsGpsB*<sup>Ile13</sup> and *BsGpsB*<sup>Lys16</sup> are denoted  
731 by respective red numerals. Hydrogen bonds are shown as black dashed lines and the van der  
732 Waals' interactions between *BsGpsB*<sup>Leu34</sup> and *LmPBPA1*<sup>Arg8</sup> are in yellow. Only one PBP-binding  
733 site is occupied by peptide in these crystals because the second site is blocked by crystal contacts.

734

735 (B) Mutation of conserved *LmPBPA1* residues results in a loss of interaction by BACTH. The  
736 removal of residues 92 to 827, correlating to the glycosyltransferase and transpeptidase domains of  
737 *LmPBPA1*, results in the *PBPA1*ΔGT-TP peptide. Empty pKT25 (-) was used as a negative control.  
738 Agar plates were photographed after 48 hours at 30°C.

739

740 (C) Effect of N-terminal *pbpA1* mutations on fosfomycin sensitivity of a Δ*pbpA2* mutant.  
741 Fosfomycin inhibits the first enzyme in the biosynthetic pathway of PG, MurA, and the Δ*gpsB*  
742 mutant is hypersensitive to fosfomycin probably because of unproductive consumption of PG  
743 precursors due to mis-regulated *LmPBPA1*<sup>20</sup>. Wild-type and mutant *L. monocytogenes* EGD-e  
744 strains were grown as confluent layers on BHI agar plates at 37°C and 42°C and halo diameters  
745 around fosfomycin-containing filter discs were measured and corrected for the disc diameter. The  
746 experiment was performed in triplicate, and average values and standard deviations are shown.  
747 Asterisks indicate statistically significant differences ( $P < 0.01$ ).

748

749 **Figure 3. The conserved SRxxR(R/K) motif identifies *BsYpbE* and *BsYrrS* as new *BsGpsB***  
750 **binding partners.**

751 *BsYpbE*<sub>1-18</sub> and *BsYrrS*<sub>1-21</sub> bind to *BsGpsB*<sub>1-68</sub> at the same site as *BsPBP1*. Fluorescence  
752 polarisation of the binding of *BsGpsB*<sub>1-68</sub> to fluorescein-labelled *BsYpbE*<sub>1-18</sub> (A) and fluorescein-

753 labelled *BsYrrS*<sub>1-21</sub> (**B**). The interaction of wildtype proteins is depicted by the black curve, whereas  
754 the red curve and dashed black line correspond to the same experiment conducted with *BsGpsB*<sub>1-68</sub>  
755 <sup>Asp31Ala</sup> and *BsGpsB*<sub>1-68</sub><sup>Tyr25Phe</sup> mutants, respectively.

756

757 (**C**) BACTH reveals a new *BsGpsB* interaction network involving a set of proteins that encode the  
758 conserved SRxxR(R/K) motif. The panel shows pairwise combinations of the proteins expressed as  
759 N-terminal fusions to both halves of the adenylyl cyclase protein in the BACTH host strain. Their  
760 presence in complexes containing *BsRodZ*, *BsPBP4b* and *BsPBP1* imply roles for *BsYrrS* and  
761 *BsYpbE* in the synthesis of the sidewall during cell growth.

762

763 (**D**) A model to recapitulate the interactions between *BsGpsB*, *BsPBP1*, *BsPBP4b*, *BsYrrS*, *BsYpbE*,  
764 *BsRodZ* and *BsMreC*. *GpsB*-*MreC*-PG synthase interactions are common to all three studied  
765 species. The individual proteins are coloured separately and each *BsGpsB* dimer is also coloured  
766 independently. Where structural models do not exist, the closest homologue in the PDB has been  
767 used instead, or an amorphous blob for where there is no structural information. 18-amino acid  
768 model helices represent each TM helix; the predicted N-terminal region of *BsPBP4b* and *BsMreC* is  
769 only six amino acids and is thus not shown.

770

771 **Figure 4. The *SpPBP2a* minidomain is not  $\alpha$ -helical but still interacts with *SpGpsB* through**  
772 **conserved arginines.**

773 (**A**) Arginine residues of *SpPBP2a* play a key role in binding to *SpGpsB*. Unless otherwise  
774 indicated, the fluorescence polarisation binding curves represent the interaction of TAMRA-  
775 labelled *SpPBP2a*<sub>23-45</sub> peptides with wildtype *SpGpsB*<sub>1-63</sub>. The relevant dissociation constants are  
776 listed in **Supplementary Table 1**.

777

778 **(B)** The structure of the *SpGpsB*<sub>4-63</sub>:*SpPBP2a*<sub>27-40</sub> complex reveals the critical role of *SpPBP2a*  
779 arginines for the interaction with *SpGpsB*. In this cartoon, *SpGpsB*<sub>4-63</sub> is coloured cyan, and the  
780 *SpPBP2a*<sub>27-40</sub> peptide is coloured yellow (molecule 1) and green (molecule 2). The sidechains of  
781 Arg8 and Arg11 from the *BsGpsB*<sub>5-64</sub>:*BsPBP1*<sub>1-17</sub> complex are shown as red sticks after a global  
782 superimposition of equivalent GpsB atoms. In molecule 1, *SpPBP2a*<sup>Arg31</sup> and *SpPBP2a*<sup>Arg36</sup>  
783 superimpose with *BsGpsB*<sub>5-64</sub><sup>Arg8</sup> and *BsGpsB*<sub>5-64</sub><sup>Arg11</sup> whereas molecule 2 accommodates  
784 *SpPBP2a*<sup>Arg33</sup> and *SpPBP2a*<sup>Arg36</sup>. The carbonyl oxygens of *SpGpsB*<sup>Ile11</sup>, *SpGpsB*<sup>Phe12</sup>, *SpGpsB*<sup>Glu13</sup>  
785 and *SpGpsB*<sup>Gln14</sup> are denoted by respective red numerals.

786

787 Close-up view of the interactions of *SpPBP2a* from molecule 1 (**C**) and 2 (**D**) with *SpGpsB*<sub>4-63</sub>. Key  
788 interfacial sidechains and backbone atoms are represented in stick format; *SpGpsB*<sub>4-63</sub> is coloured  
789 cyan and *SpPBP2a*<sub>27-40</sub> is coloured green. The van der Waals' interactions between *SpGpsB*<sup>Leu32</sup>  
790 and *SpPBP1*<sup>Arg31</sup> (molecule 1) and *SpPBP1*<sup>Arg33</sup> (molecule 2) are in yellow.

791

## 792 **Figure 5. *SpPBP2a* does not phenocopy *SpGpsB*.**

793 **(A)** Mutations in *SpGpsB* differentially affect interactions with *SpPBP2a* and *SpMreC*. BACTH  
794 analysis of the interactions of *SpGpsB*-T18 variants with wildtype *SpGpsB*, *SpPBP2a* and *SpMreC*.  
795 pKT25/pUT18C and pKT25-*zip*/pUT18C-*zip* plasmid pairs were used as negative (-ve) and  
796 positive (+ve) controls, respectively. The agar plates were photographed after 40 h of incubation at  
797 30°C.

798

799 *SpGpsB* variants that have lost *SpPBP2a* binding have a *gpsB* null growth and morphology  
800 phenotype. Representative growth curve of *S. pneumoniae* strains with ectopic expression of *gpsB*<sup>+</sup>  
801 under a Zn<sup>2+</sup>-dependent promoter. GpsB variants of Y23A, V28A, L32A and D33A showed a *gpsB*  
802 null growth phenotype (**B**) and elongated cell morphology (**C**) on *gpsB* depletion. The D29A  
803 variant showed an intermediate growth phenotype, which was also obtained with an independent

804 isogenic isolate and with a *gpsB*<sup>D29A</sup>-FLAG labelled strain. The I36A strain has a reduced  
805 elongation phenotype. All phase-contrast micrographs are at the same magnification (scale bar = 1  
806  $\mu\text{m}$ ).

807

808 *Sp*PPB2a depletion does not phenocopy *Sp*GpsB. Representative growth curves (**D**) and phase-  
809 contrast micrographs (**E**) of parent IU1824 (WT, D39  $\Delta\textit{cps rpsL1}$ ), IU13444 ( $\Delta\textit{pbp1a}$ ), IU14381  
810 ( $\Delta\textit{pbp2a} // \Delta\textit{bgaA}::\text{P}_{\text{Zn}}\text{-}\textit{pbp2a}^+ \Delta\textit{pbp1a}$ ) and IU14383 ( $\Delta\textit{gpsB} // \Delta\textit{bgaA}::\text{P}_{\text{Zn}}\text{-}\textit{gpsB}^+ \Delta\textit{pbp1a}$ ). Similar  
811 to the depletion of *Sp*GpsB in *S. pneumoniae pbp1a*<sup>+</sup> strains (see panel **B**), depletion of *Sp*GpsB in  
812 IU14383 leads to extremely elongated cells, a growth cessation and lysis phenotype. By contrast,  
813 depletion of *Sp*PPB2a in the  $\Delta\textit{pbp1a}$  background (right hand panels) leads to small but mostly  
814 ovococcal cells that do not lyse during the time course examined. All phase-contrast micrographs  
815 were taken at  $\text{OD}_{620} \approx 0.15$  or at the time point marked by arrows in (A) for IU14381 and IU14383  
816 under zinc depletion and are at the same magnification (scale bar = 1  $\mu\text{m}$ ).

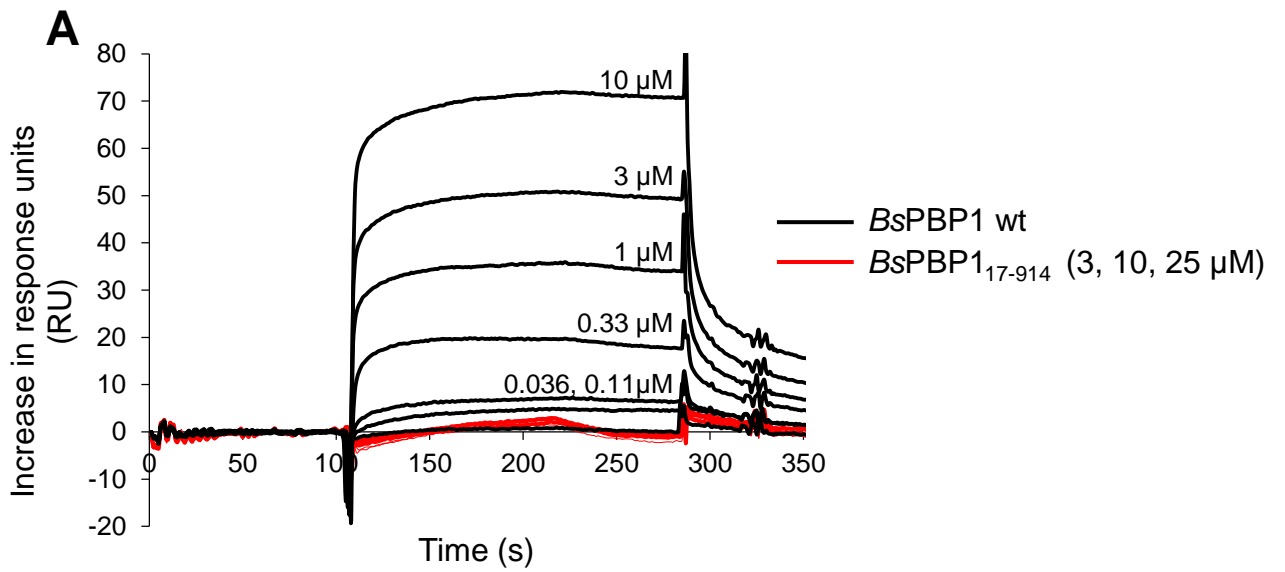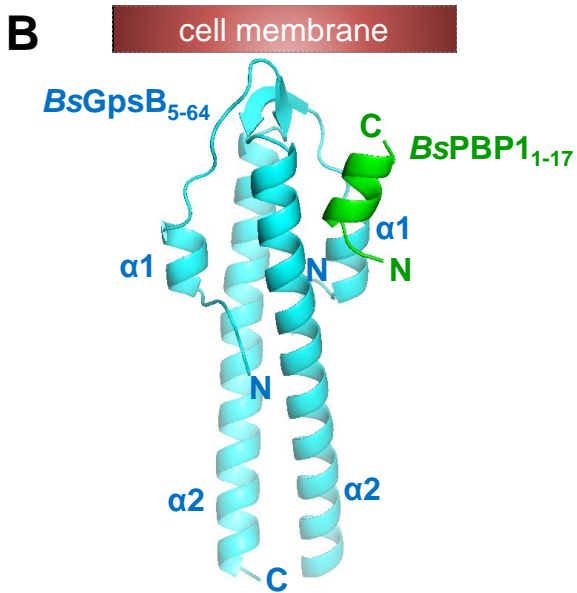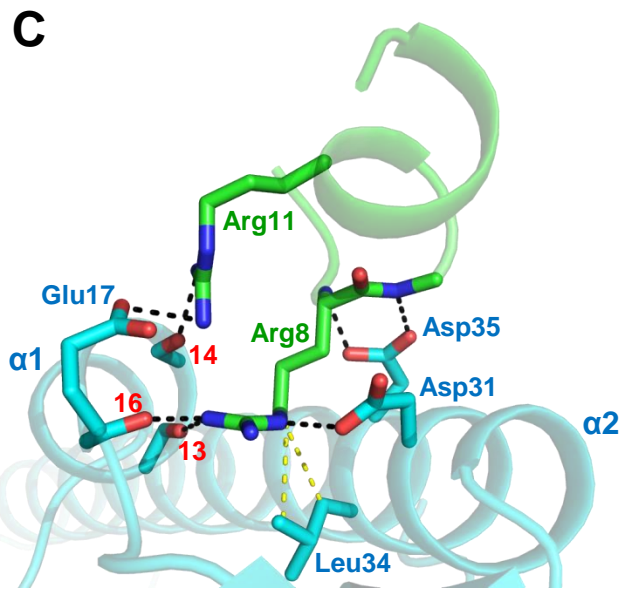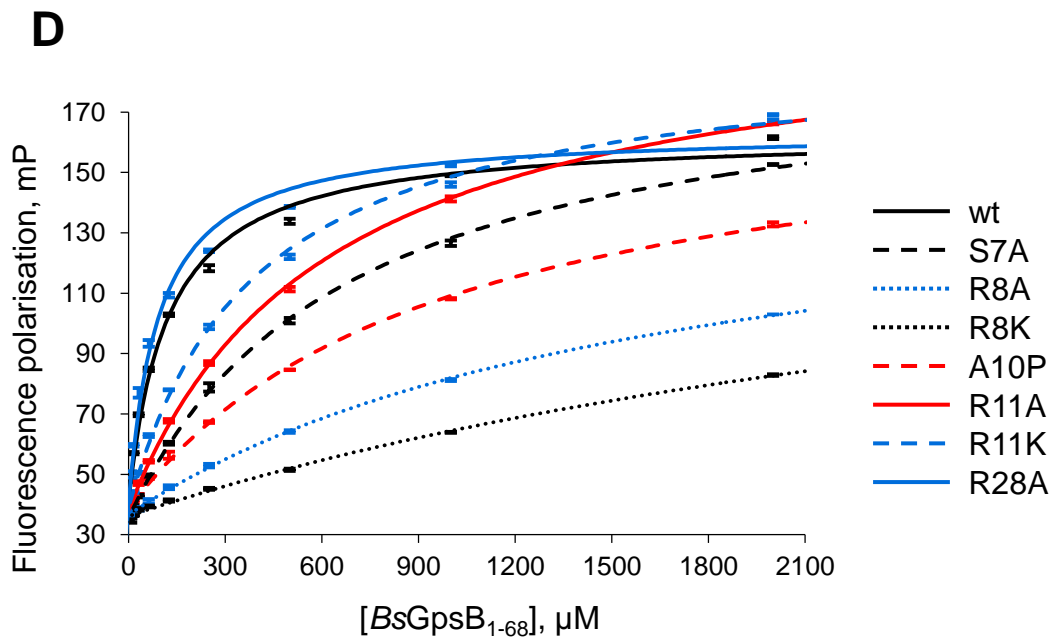

**Figure 1**

**A**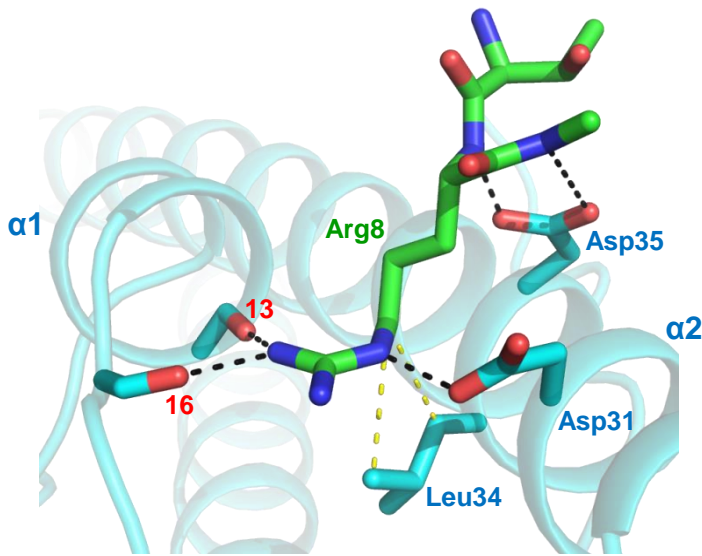**B**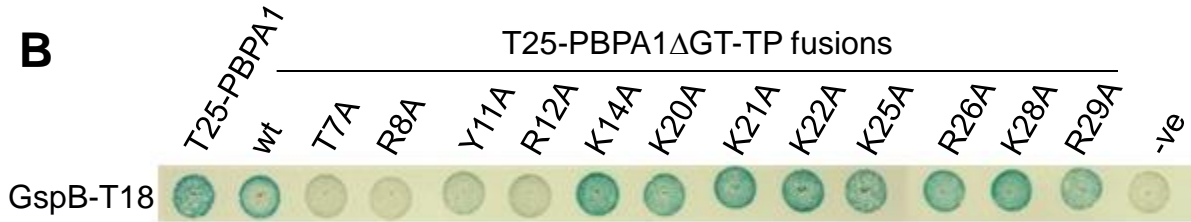**C**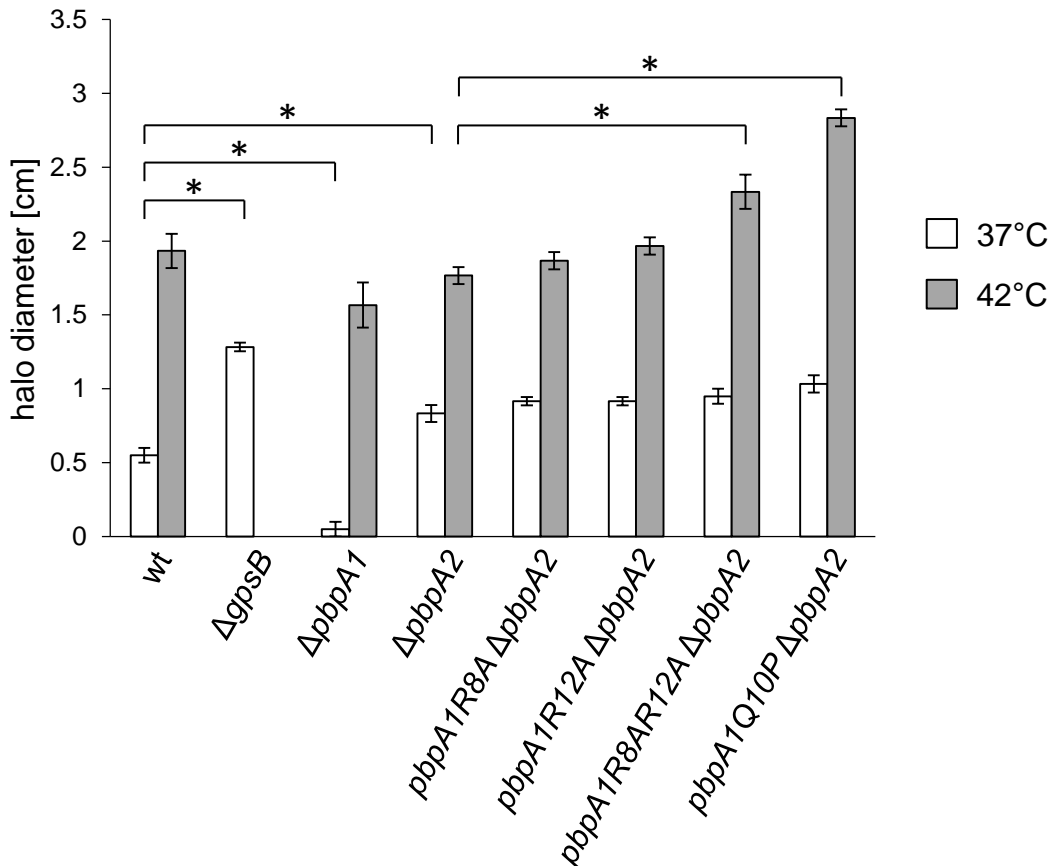**Figure 2**

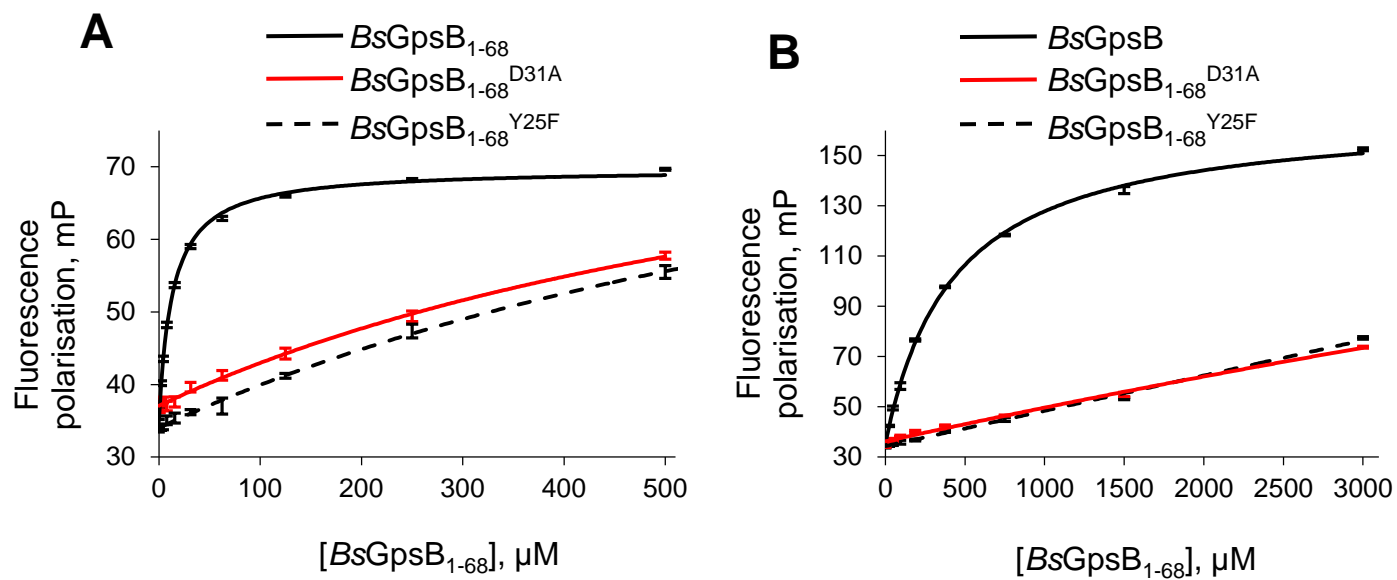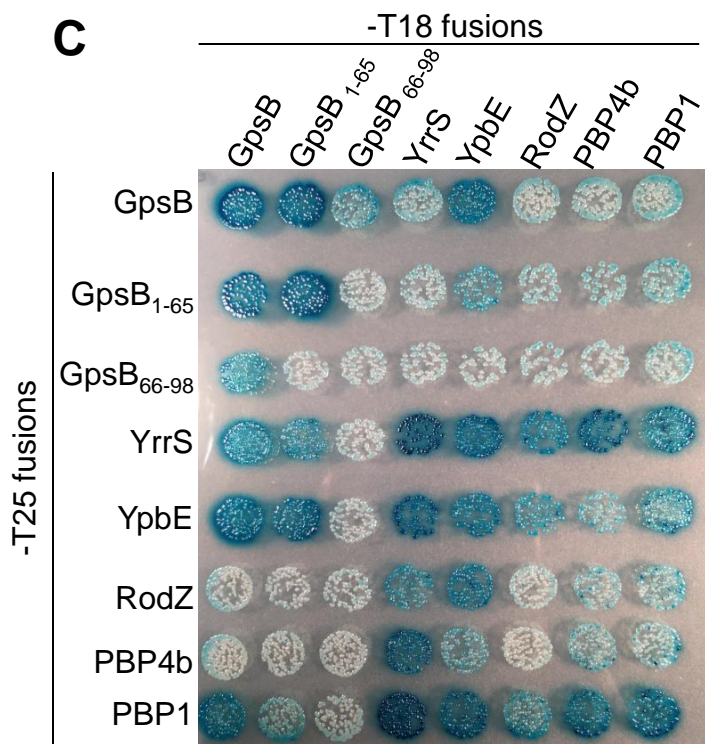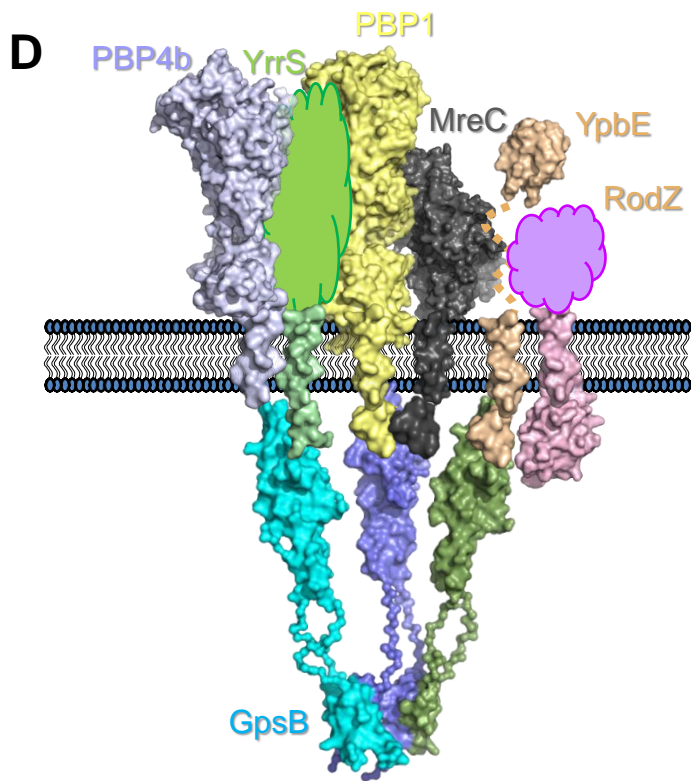

**Figure 3**



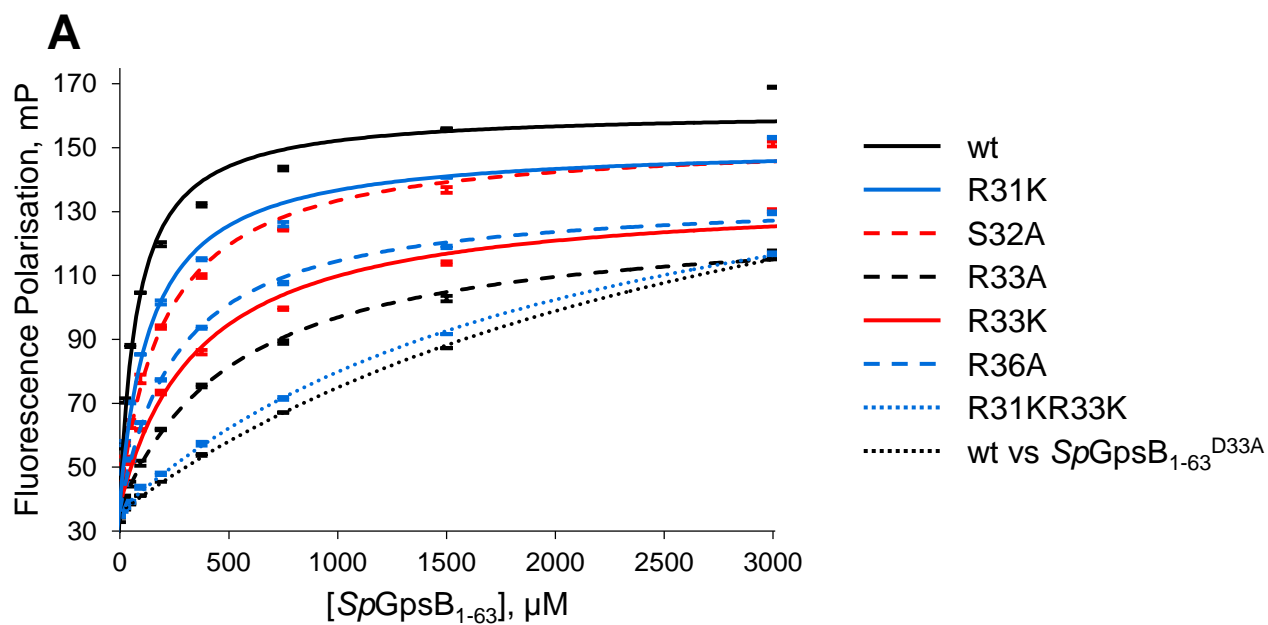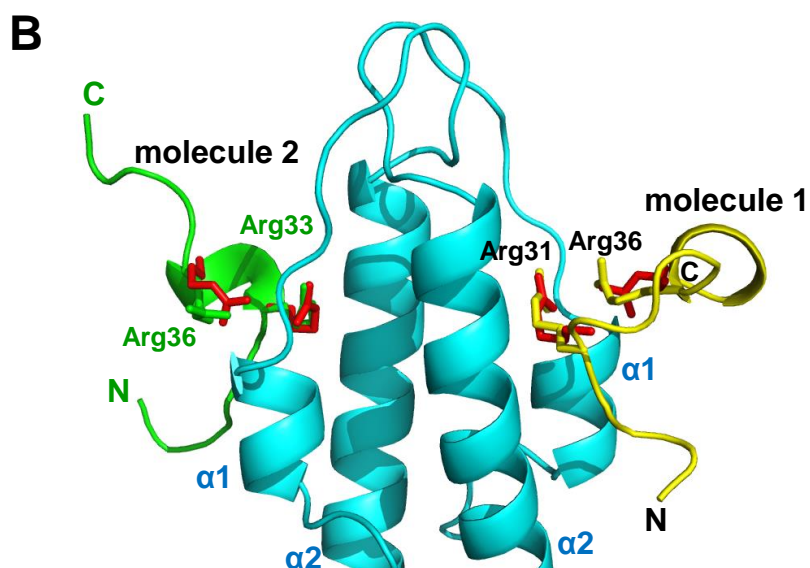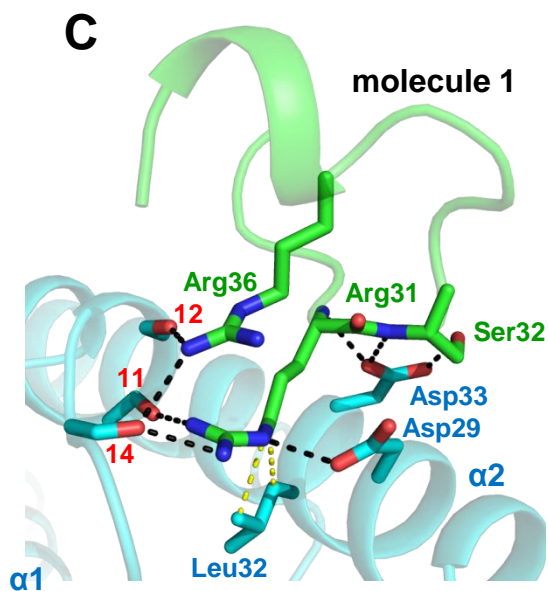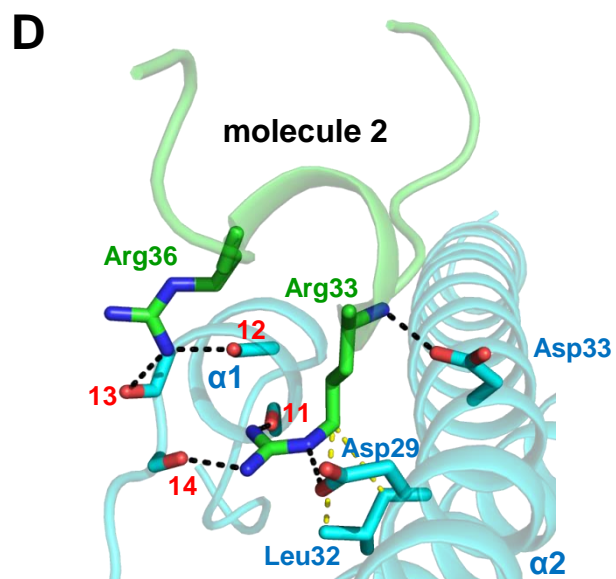

**Figure 4**

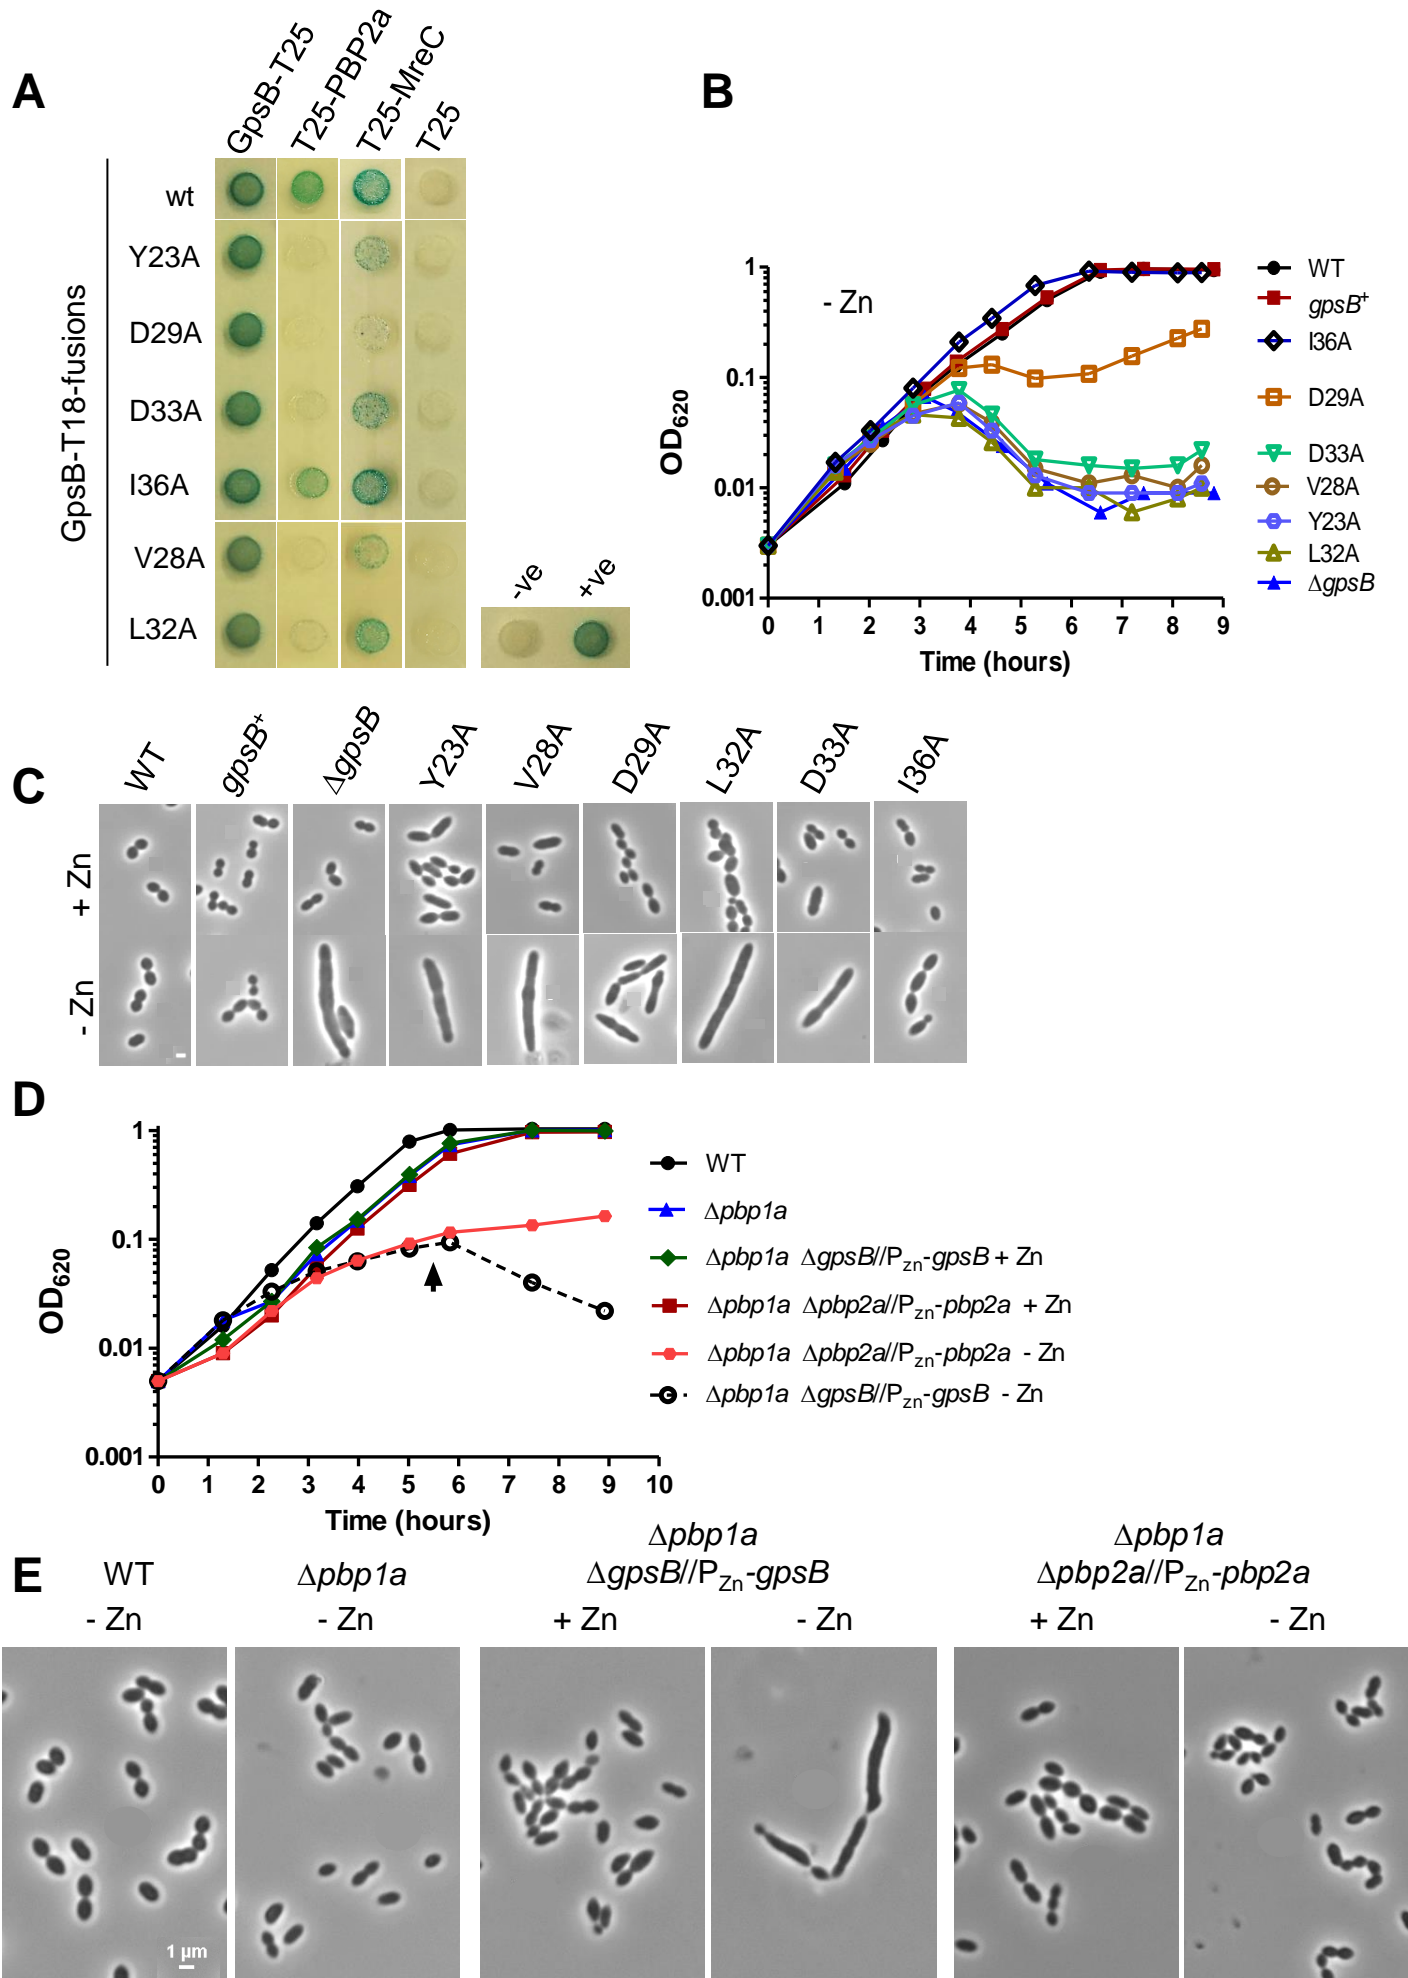

**Figure 5**
